# Supplementary material for: Clinical Value and Potential Mechanism of miRNA-33a-5p in Lung Squamous Cell Carcinoma
Source: Hindawi journal article supplement (doi:10.1155/2021/6614331), 2021-11-29

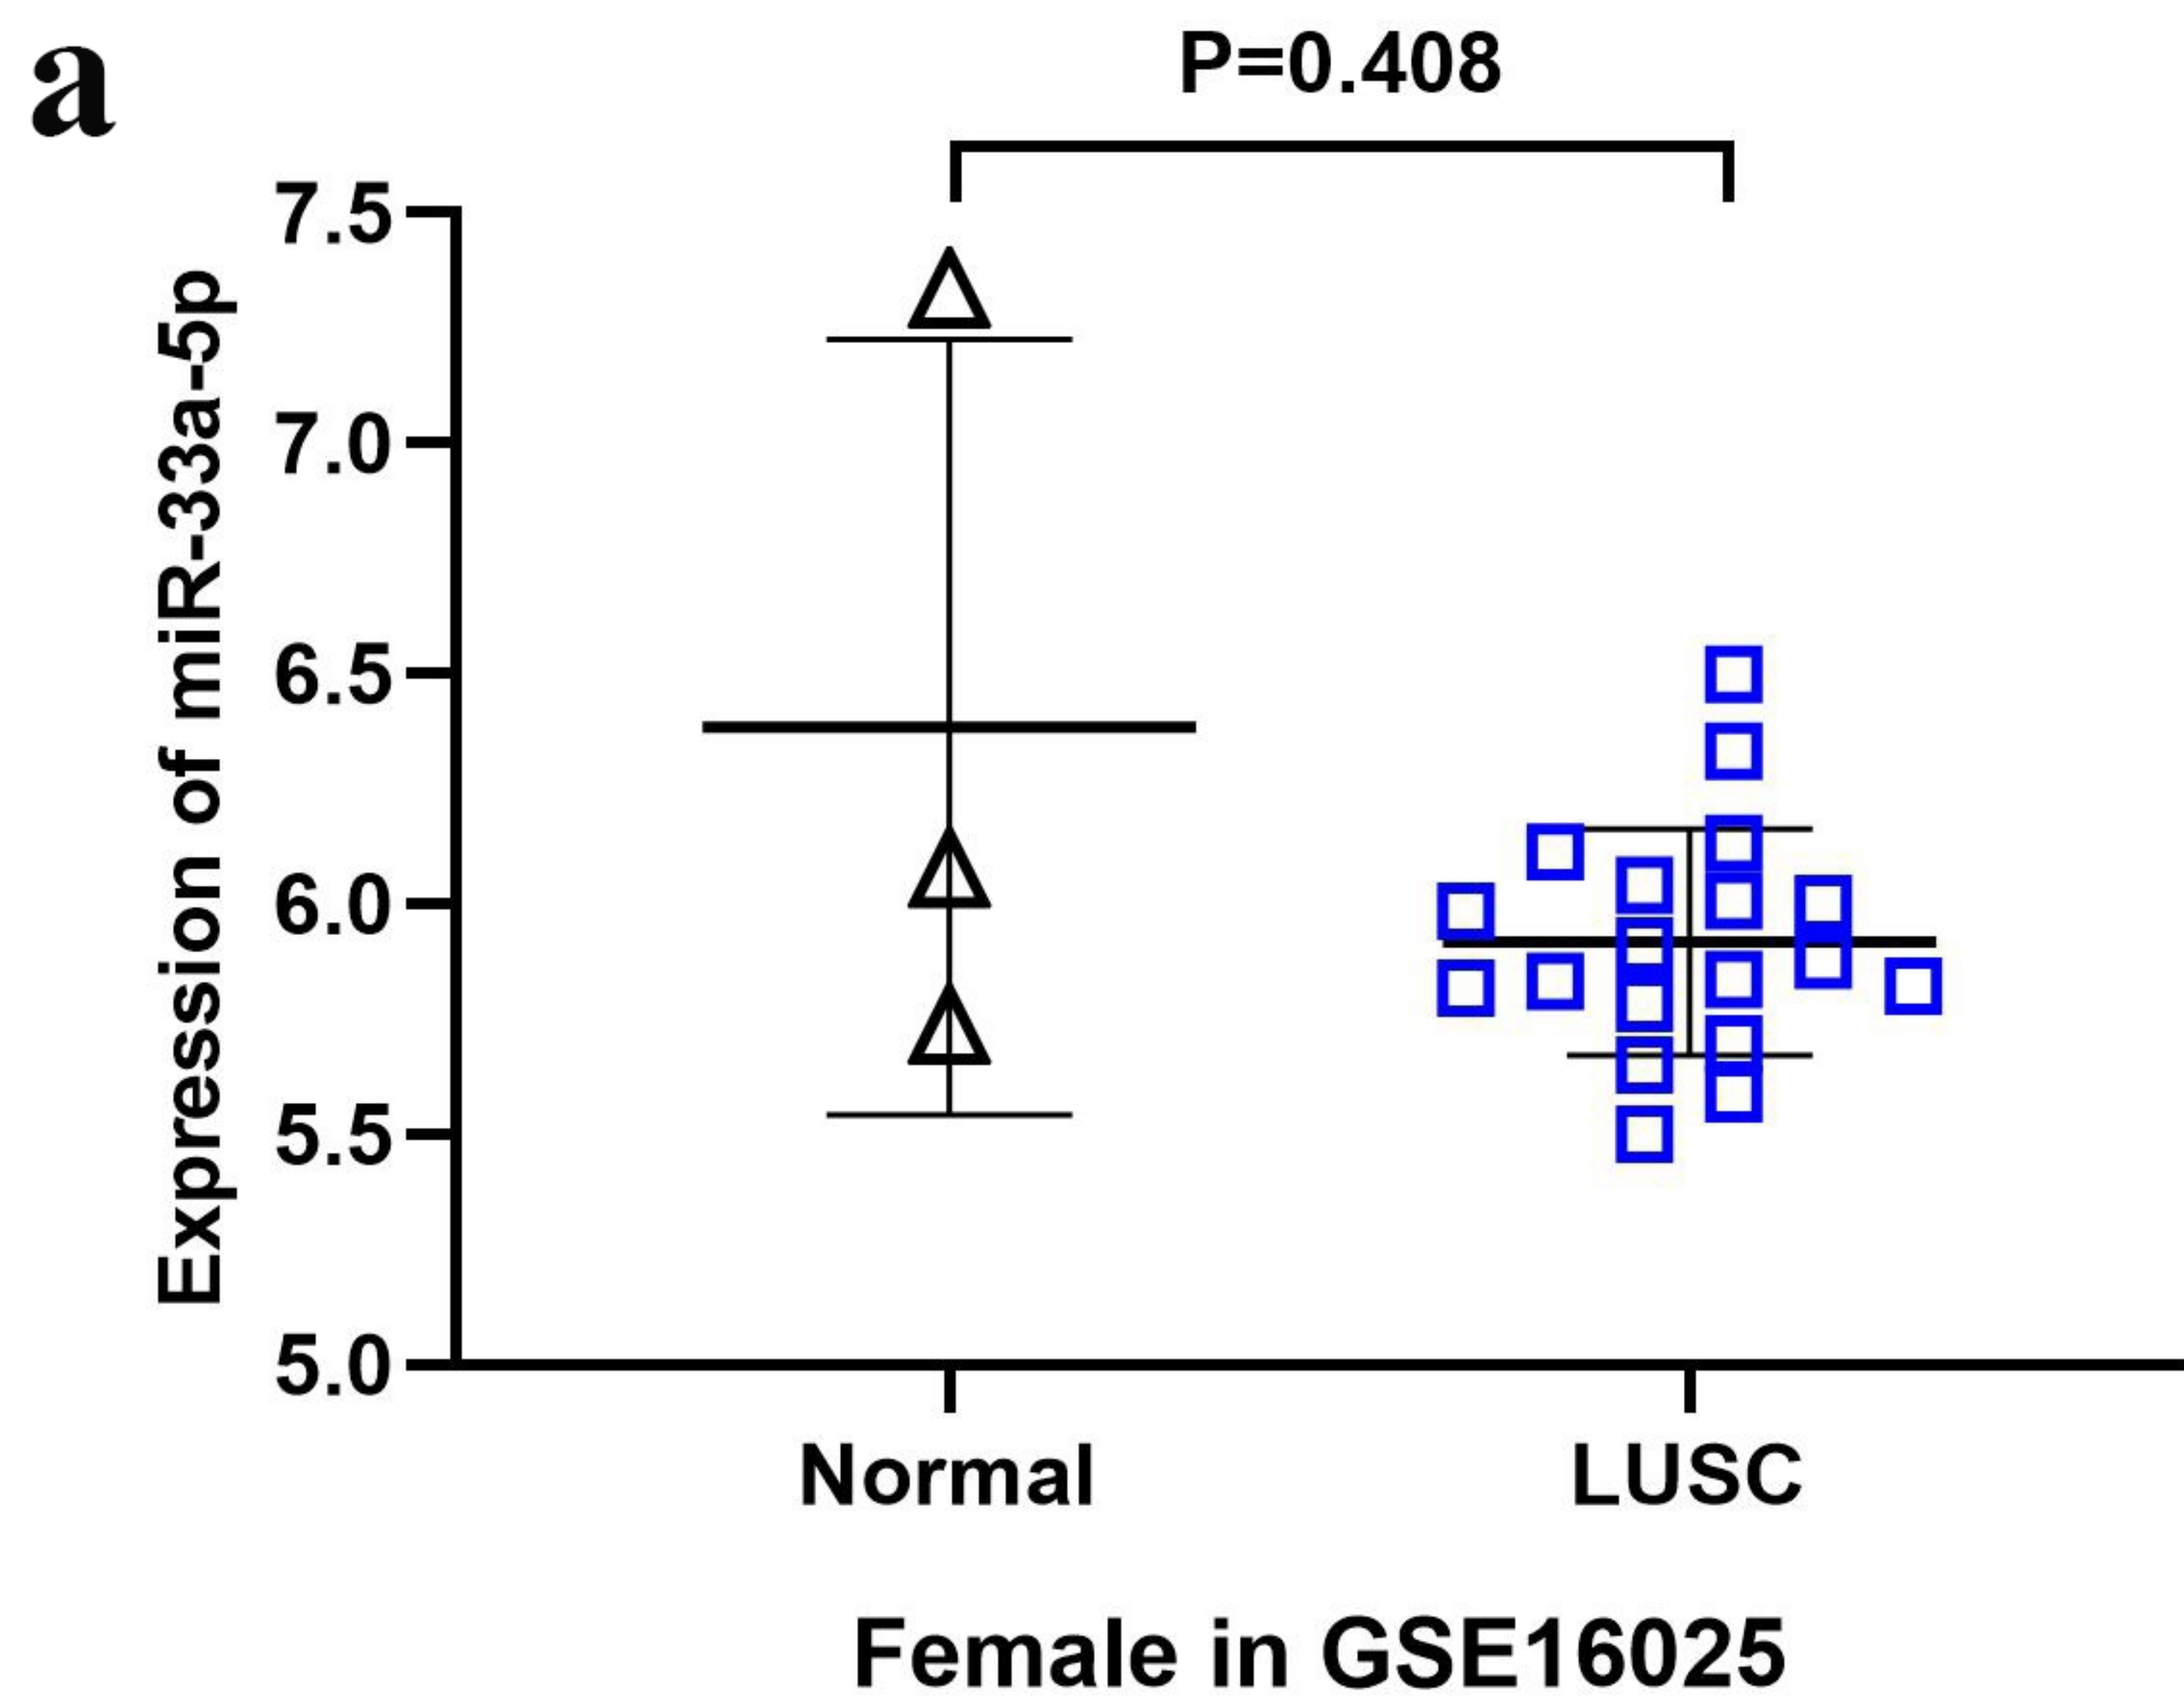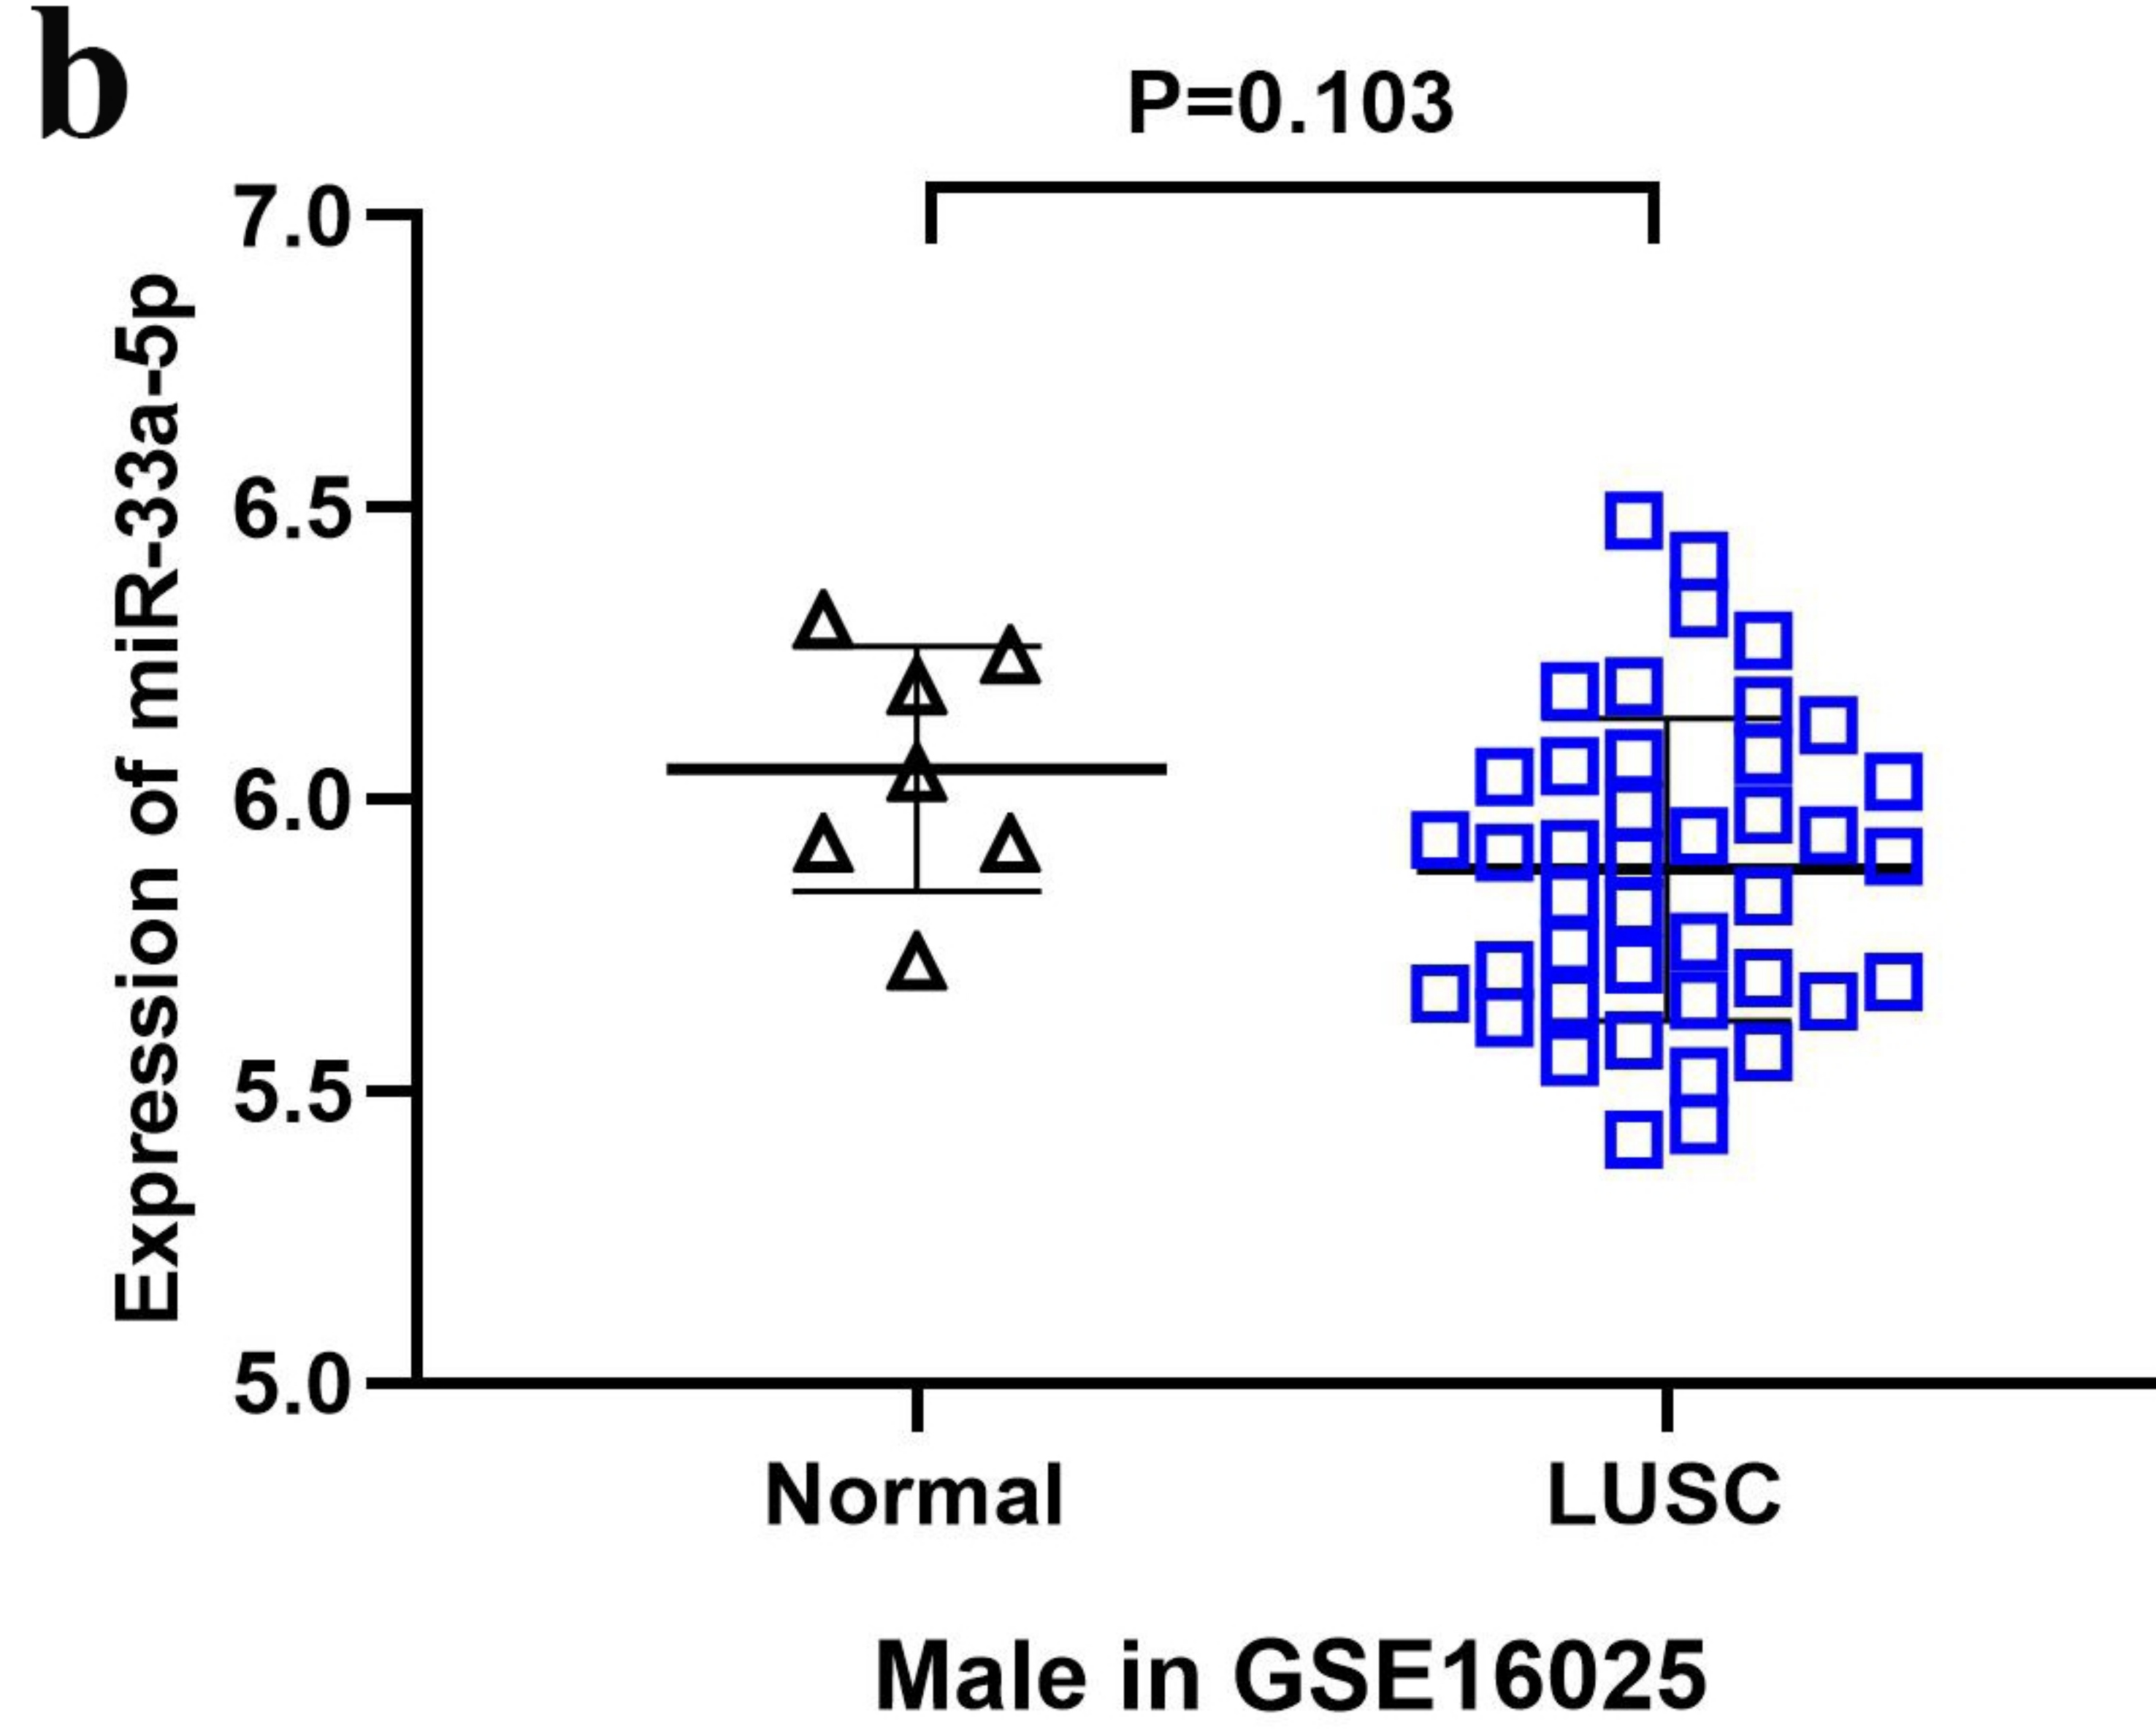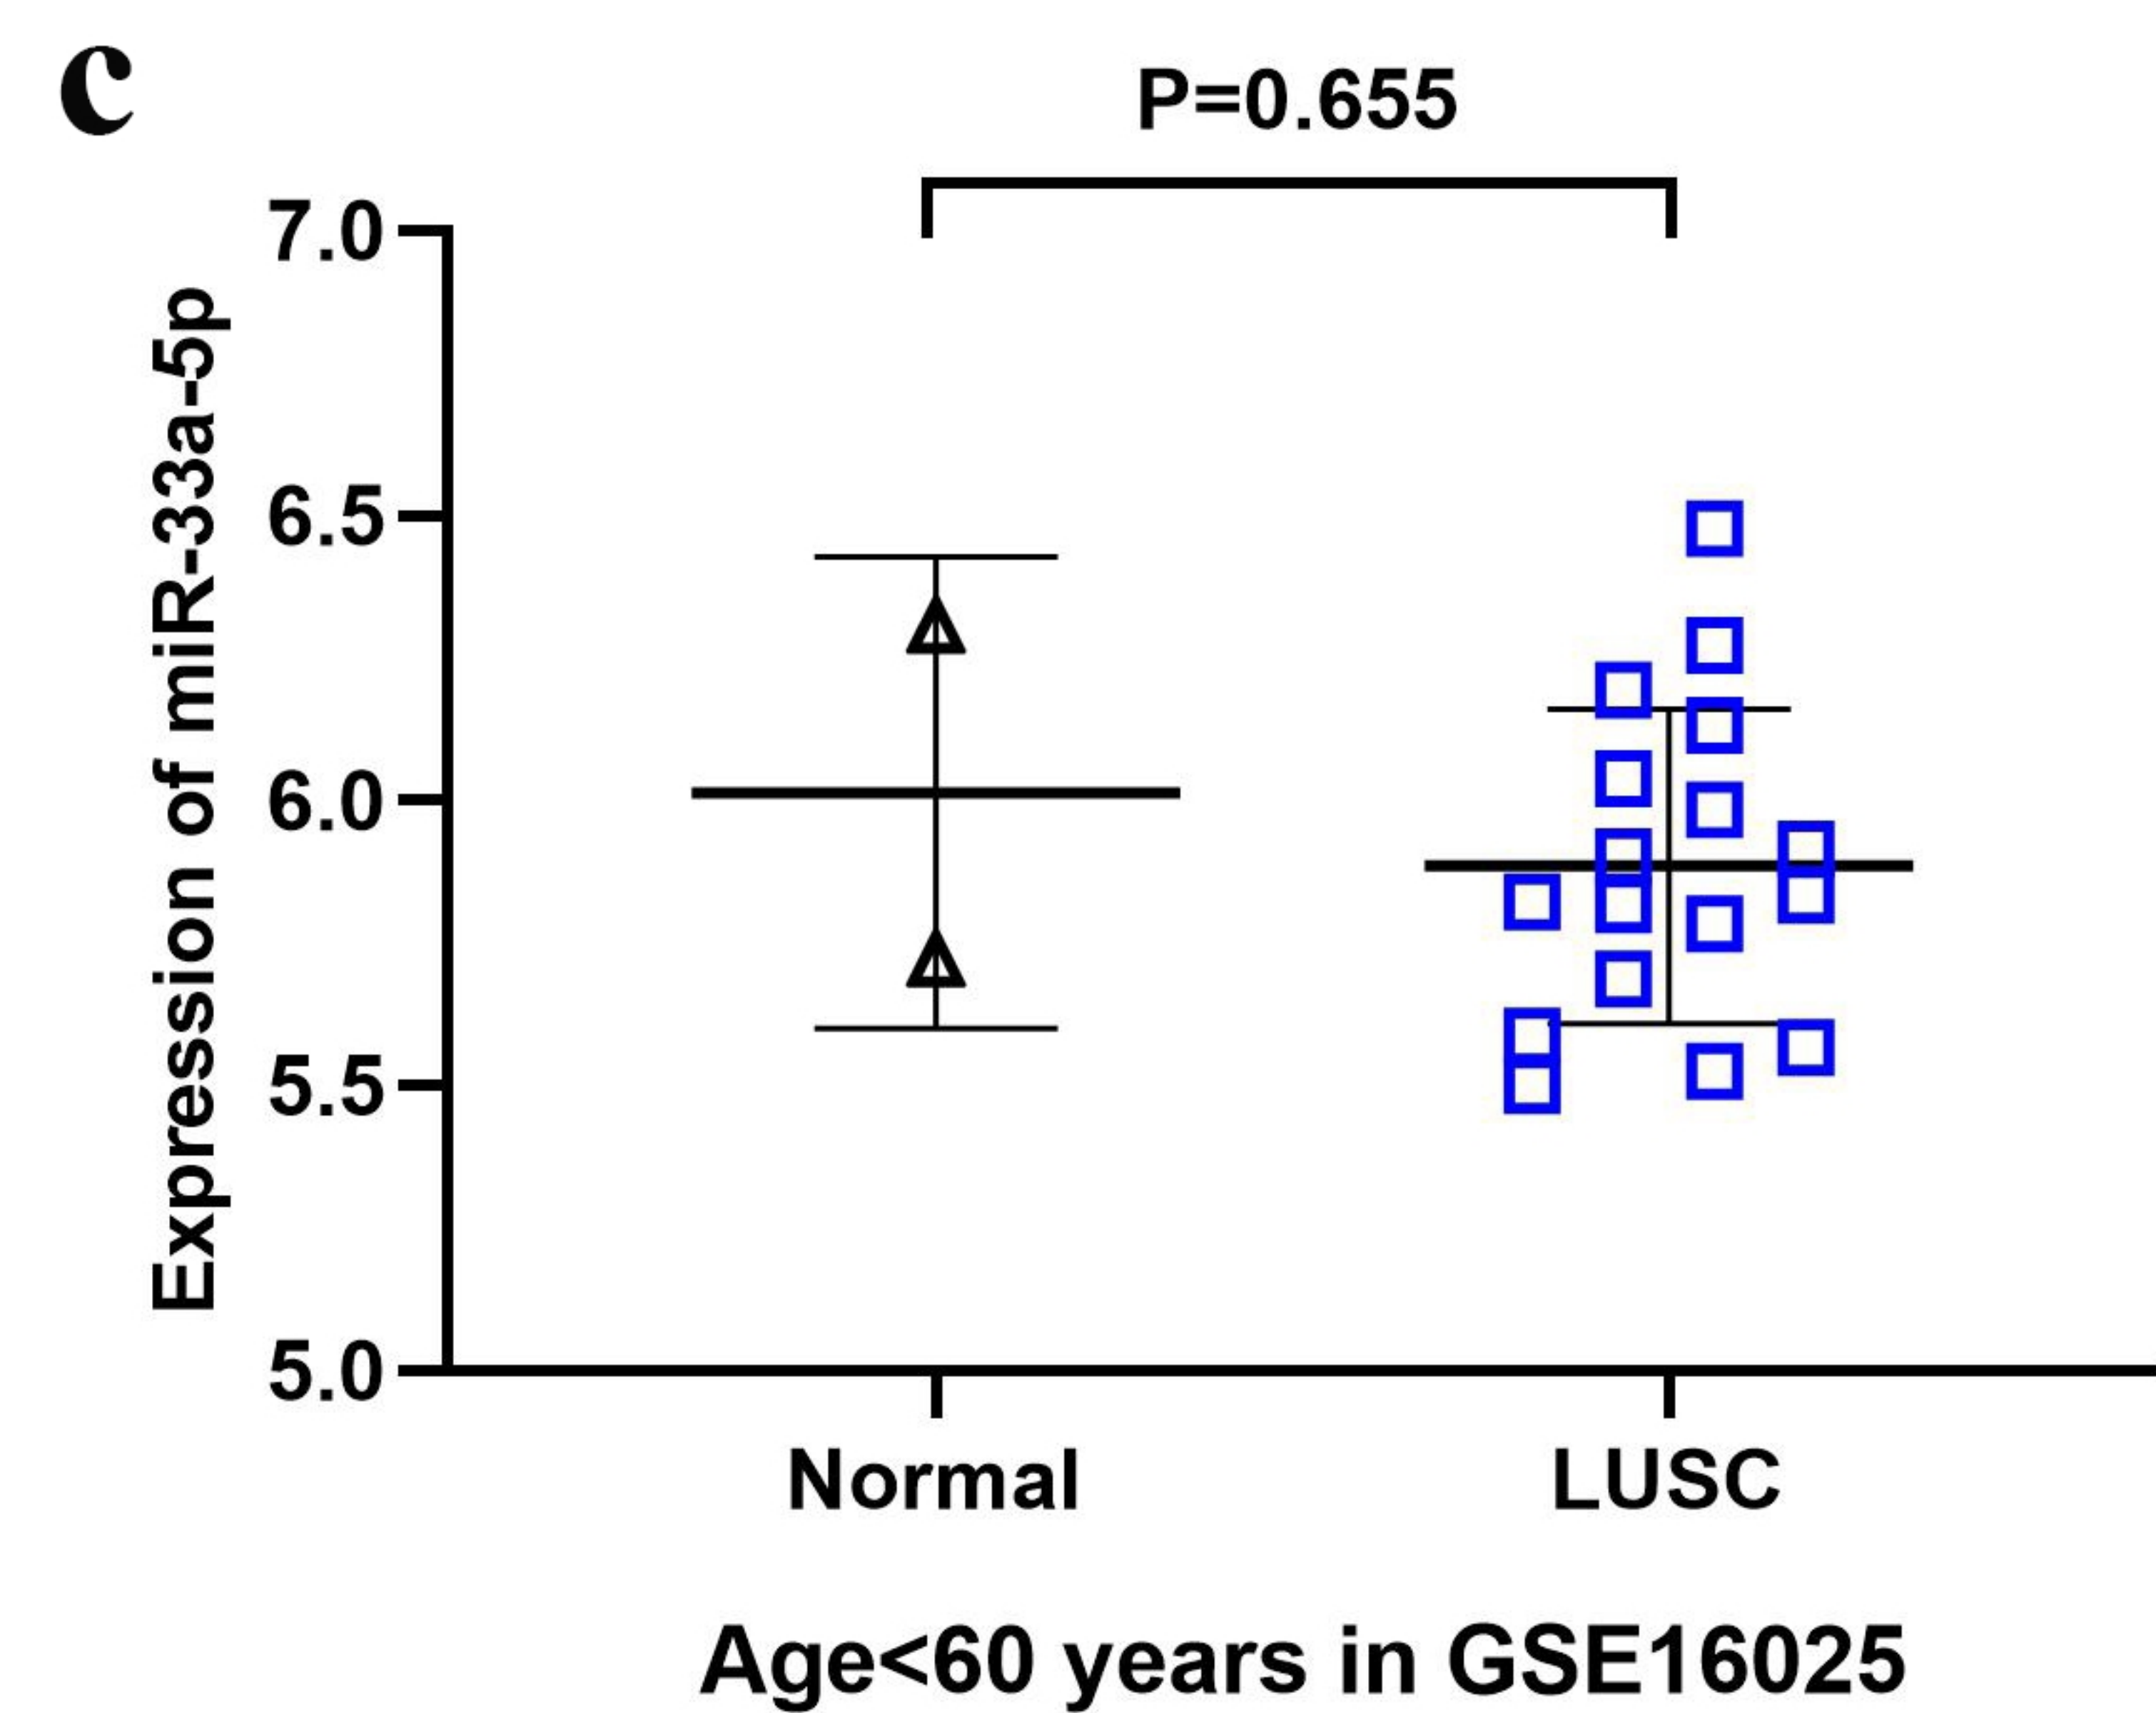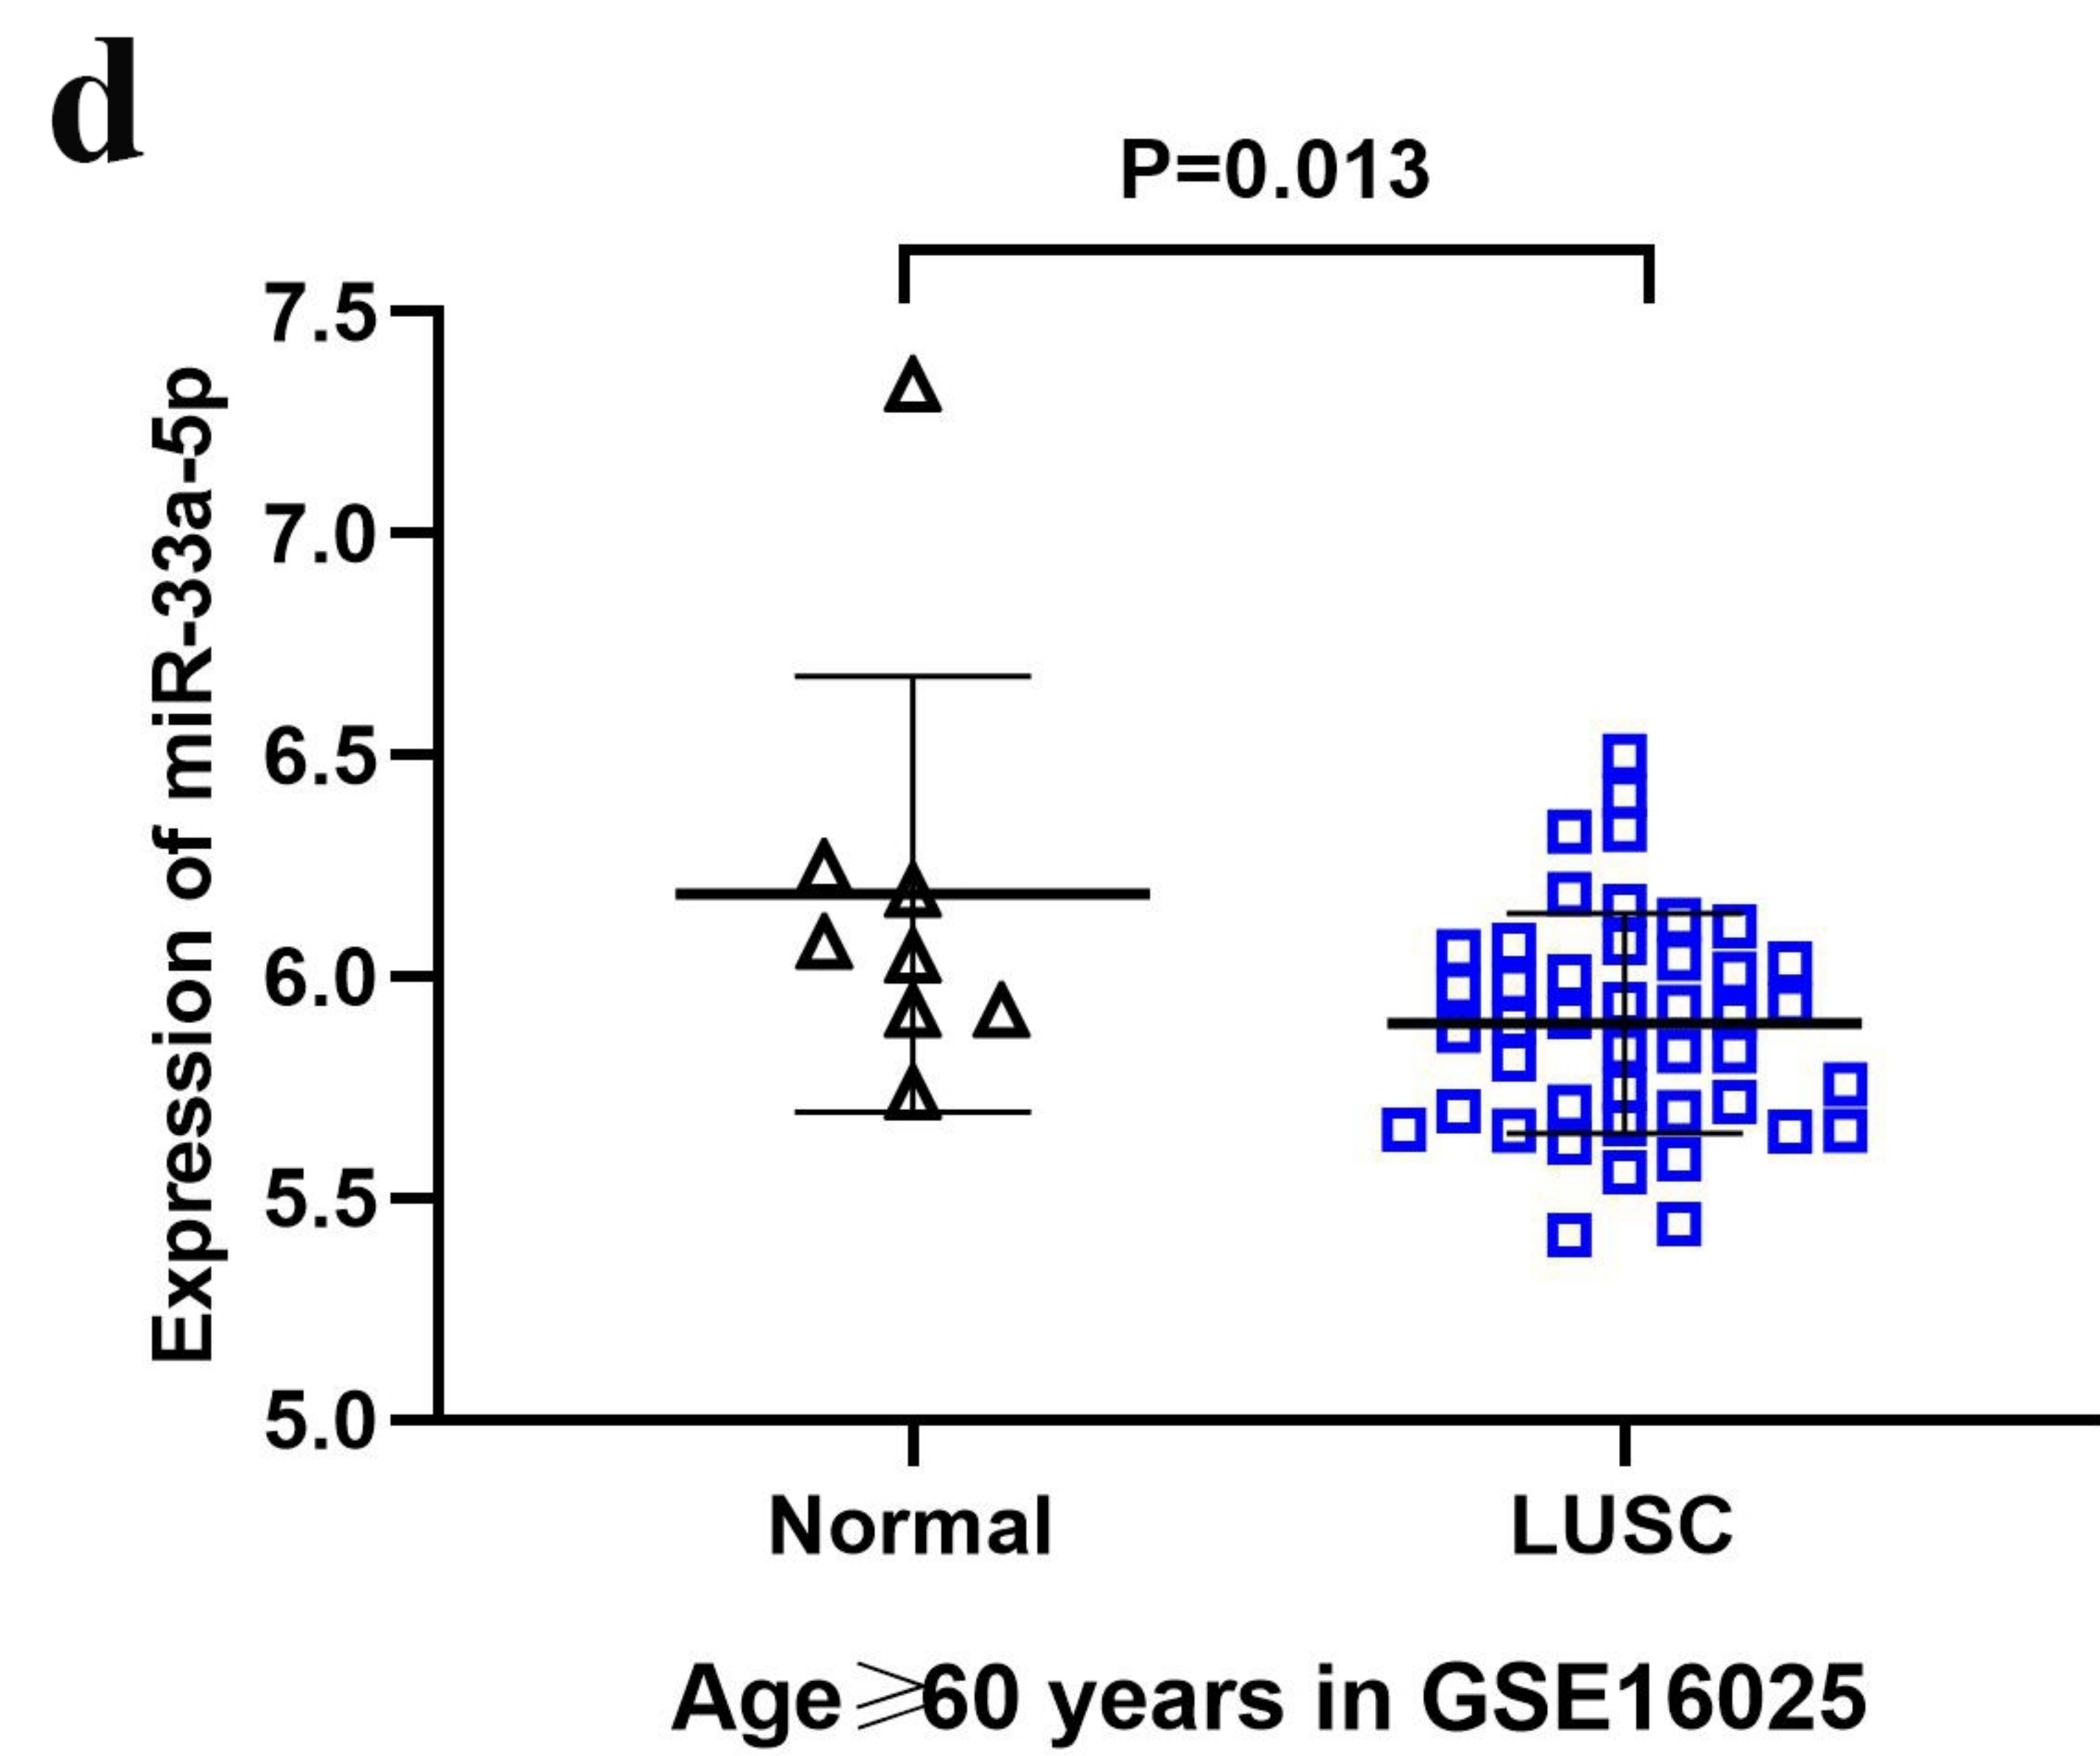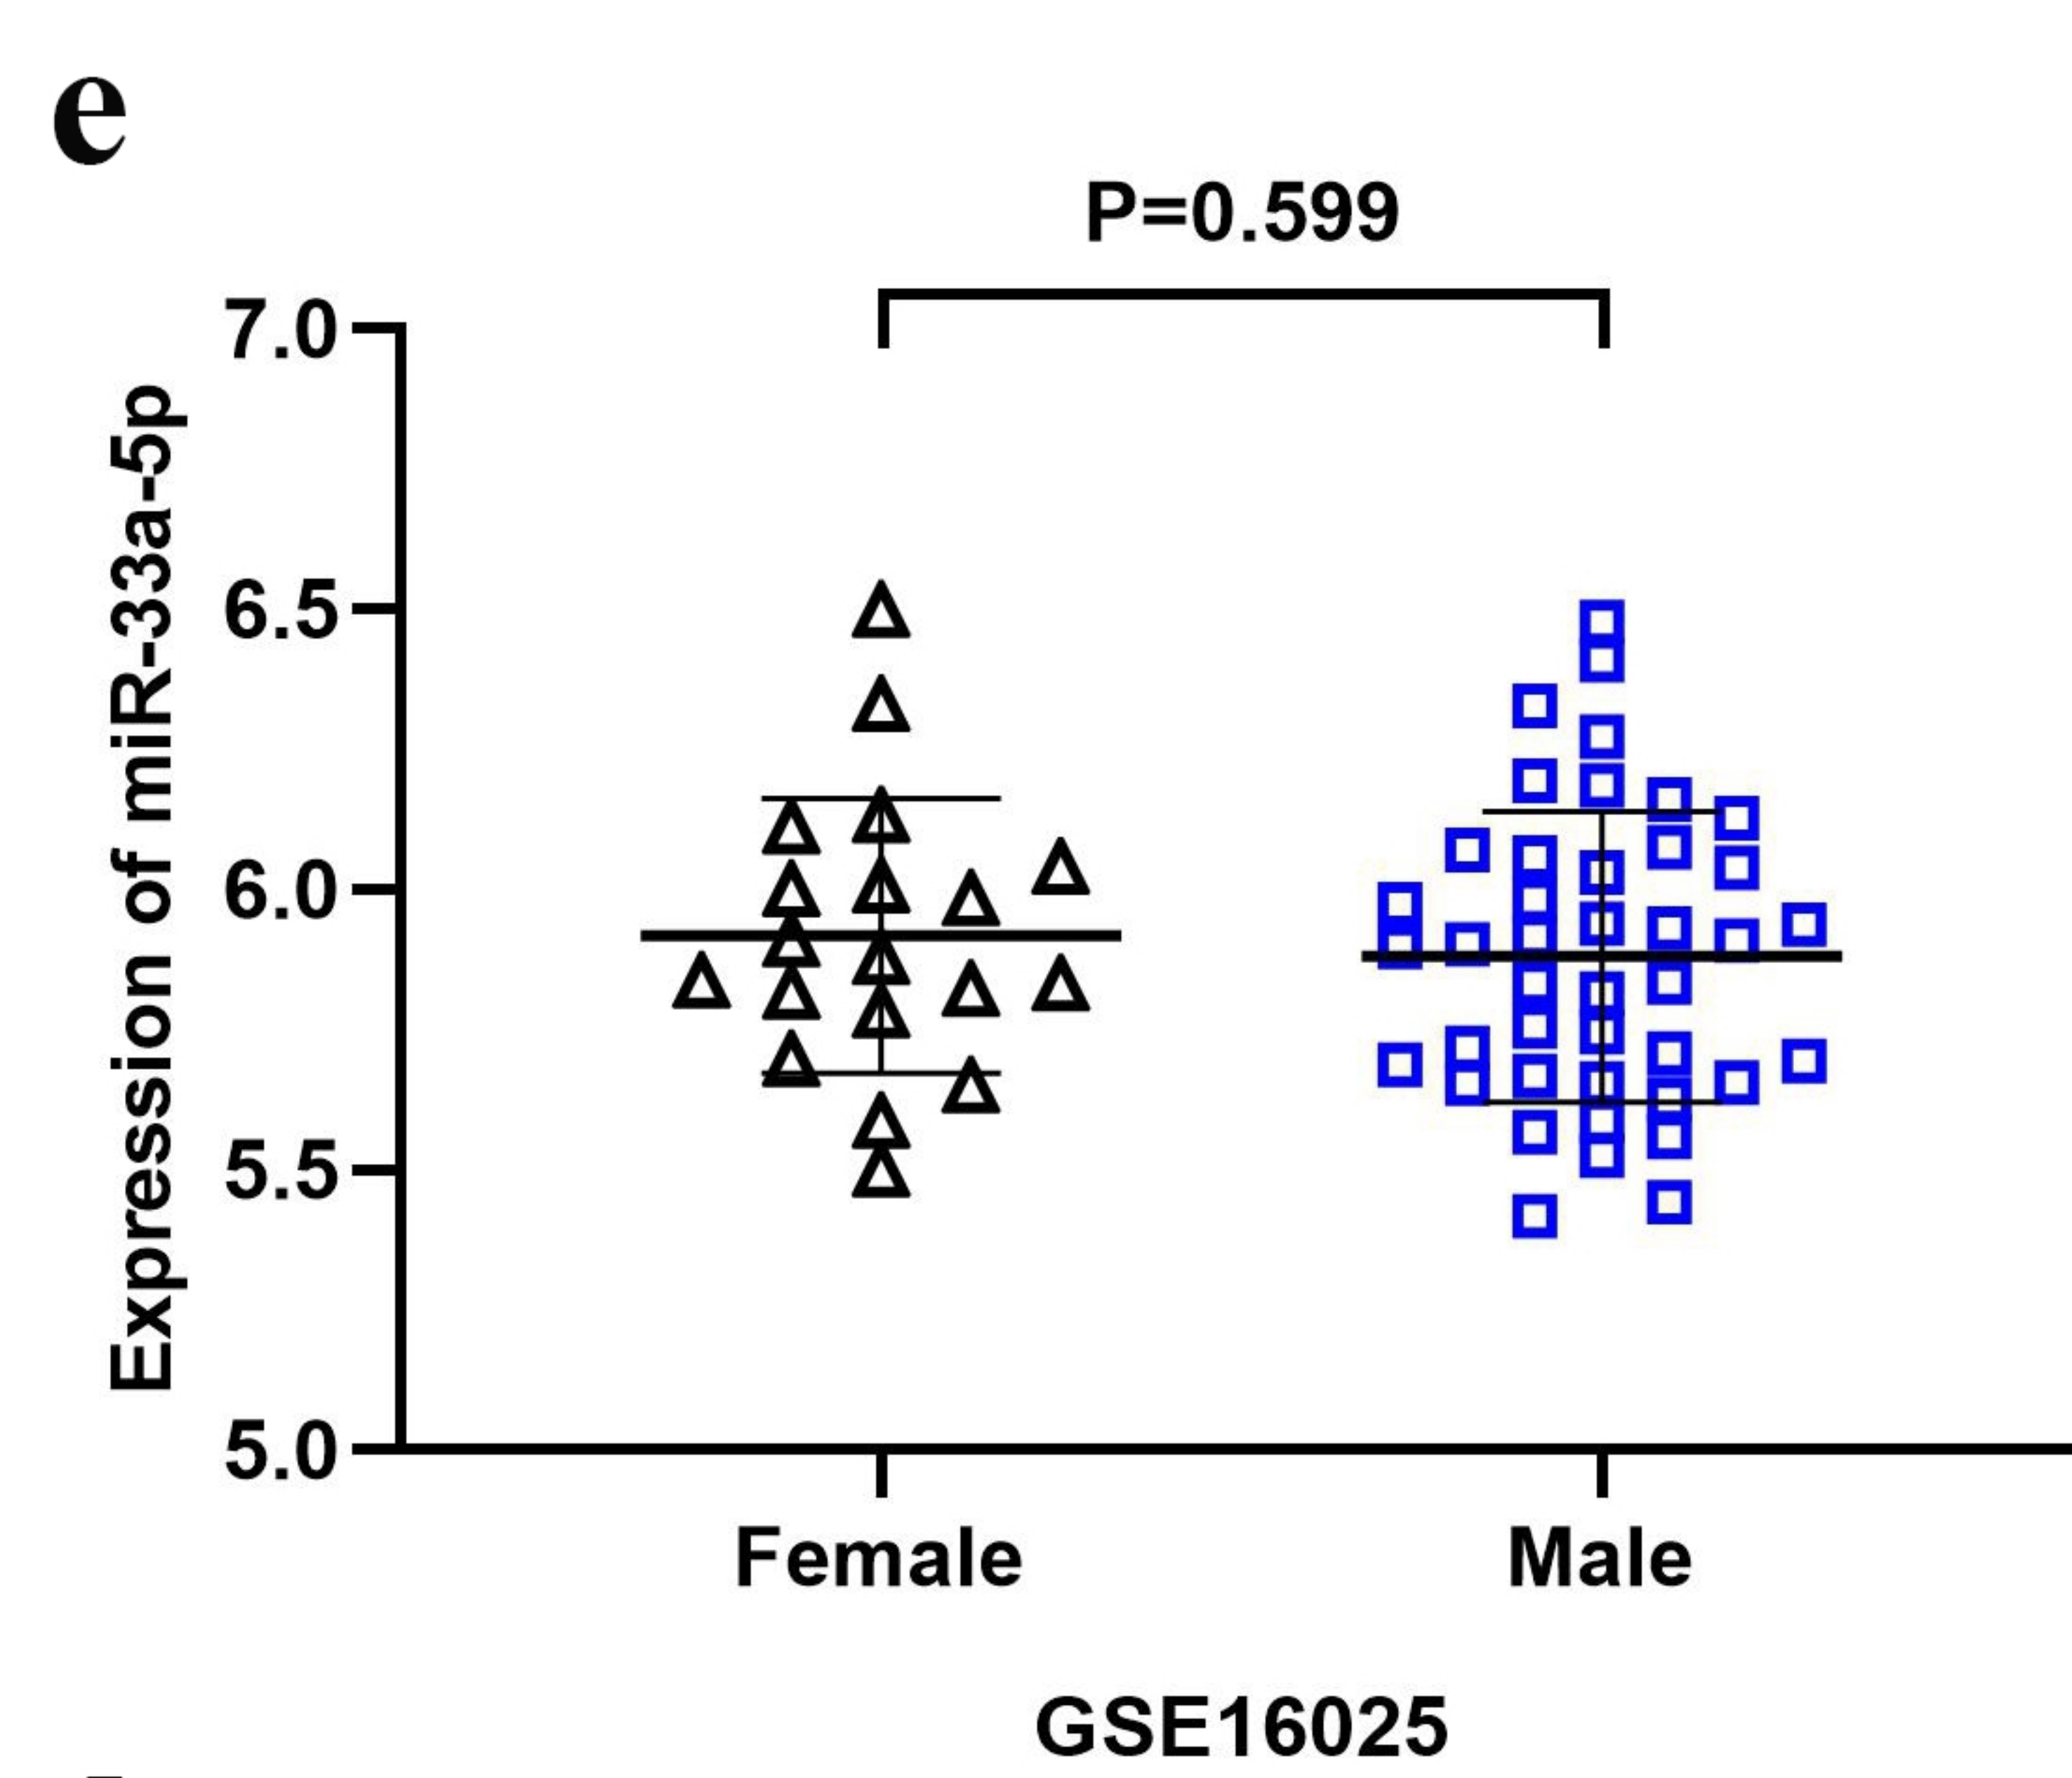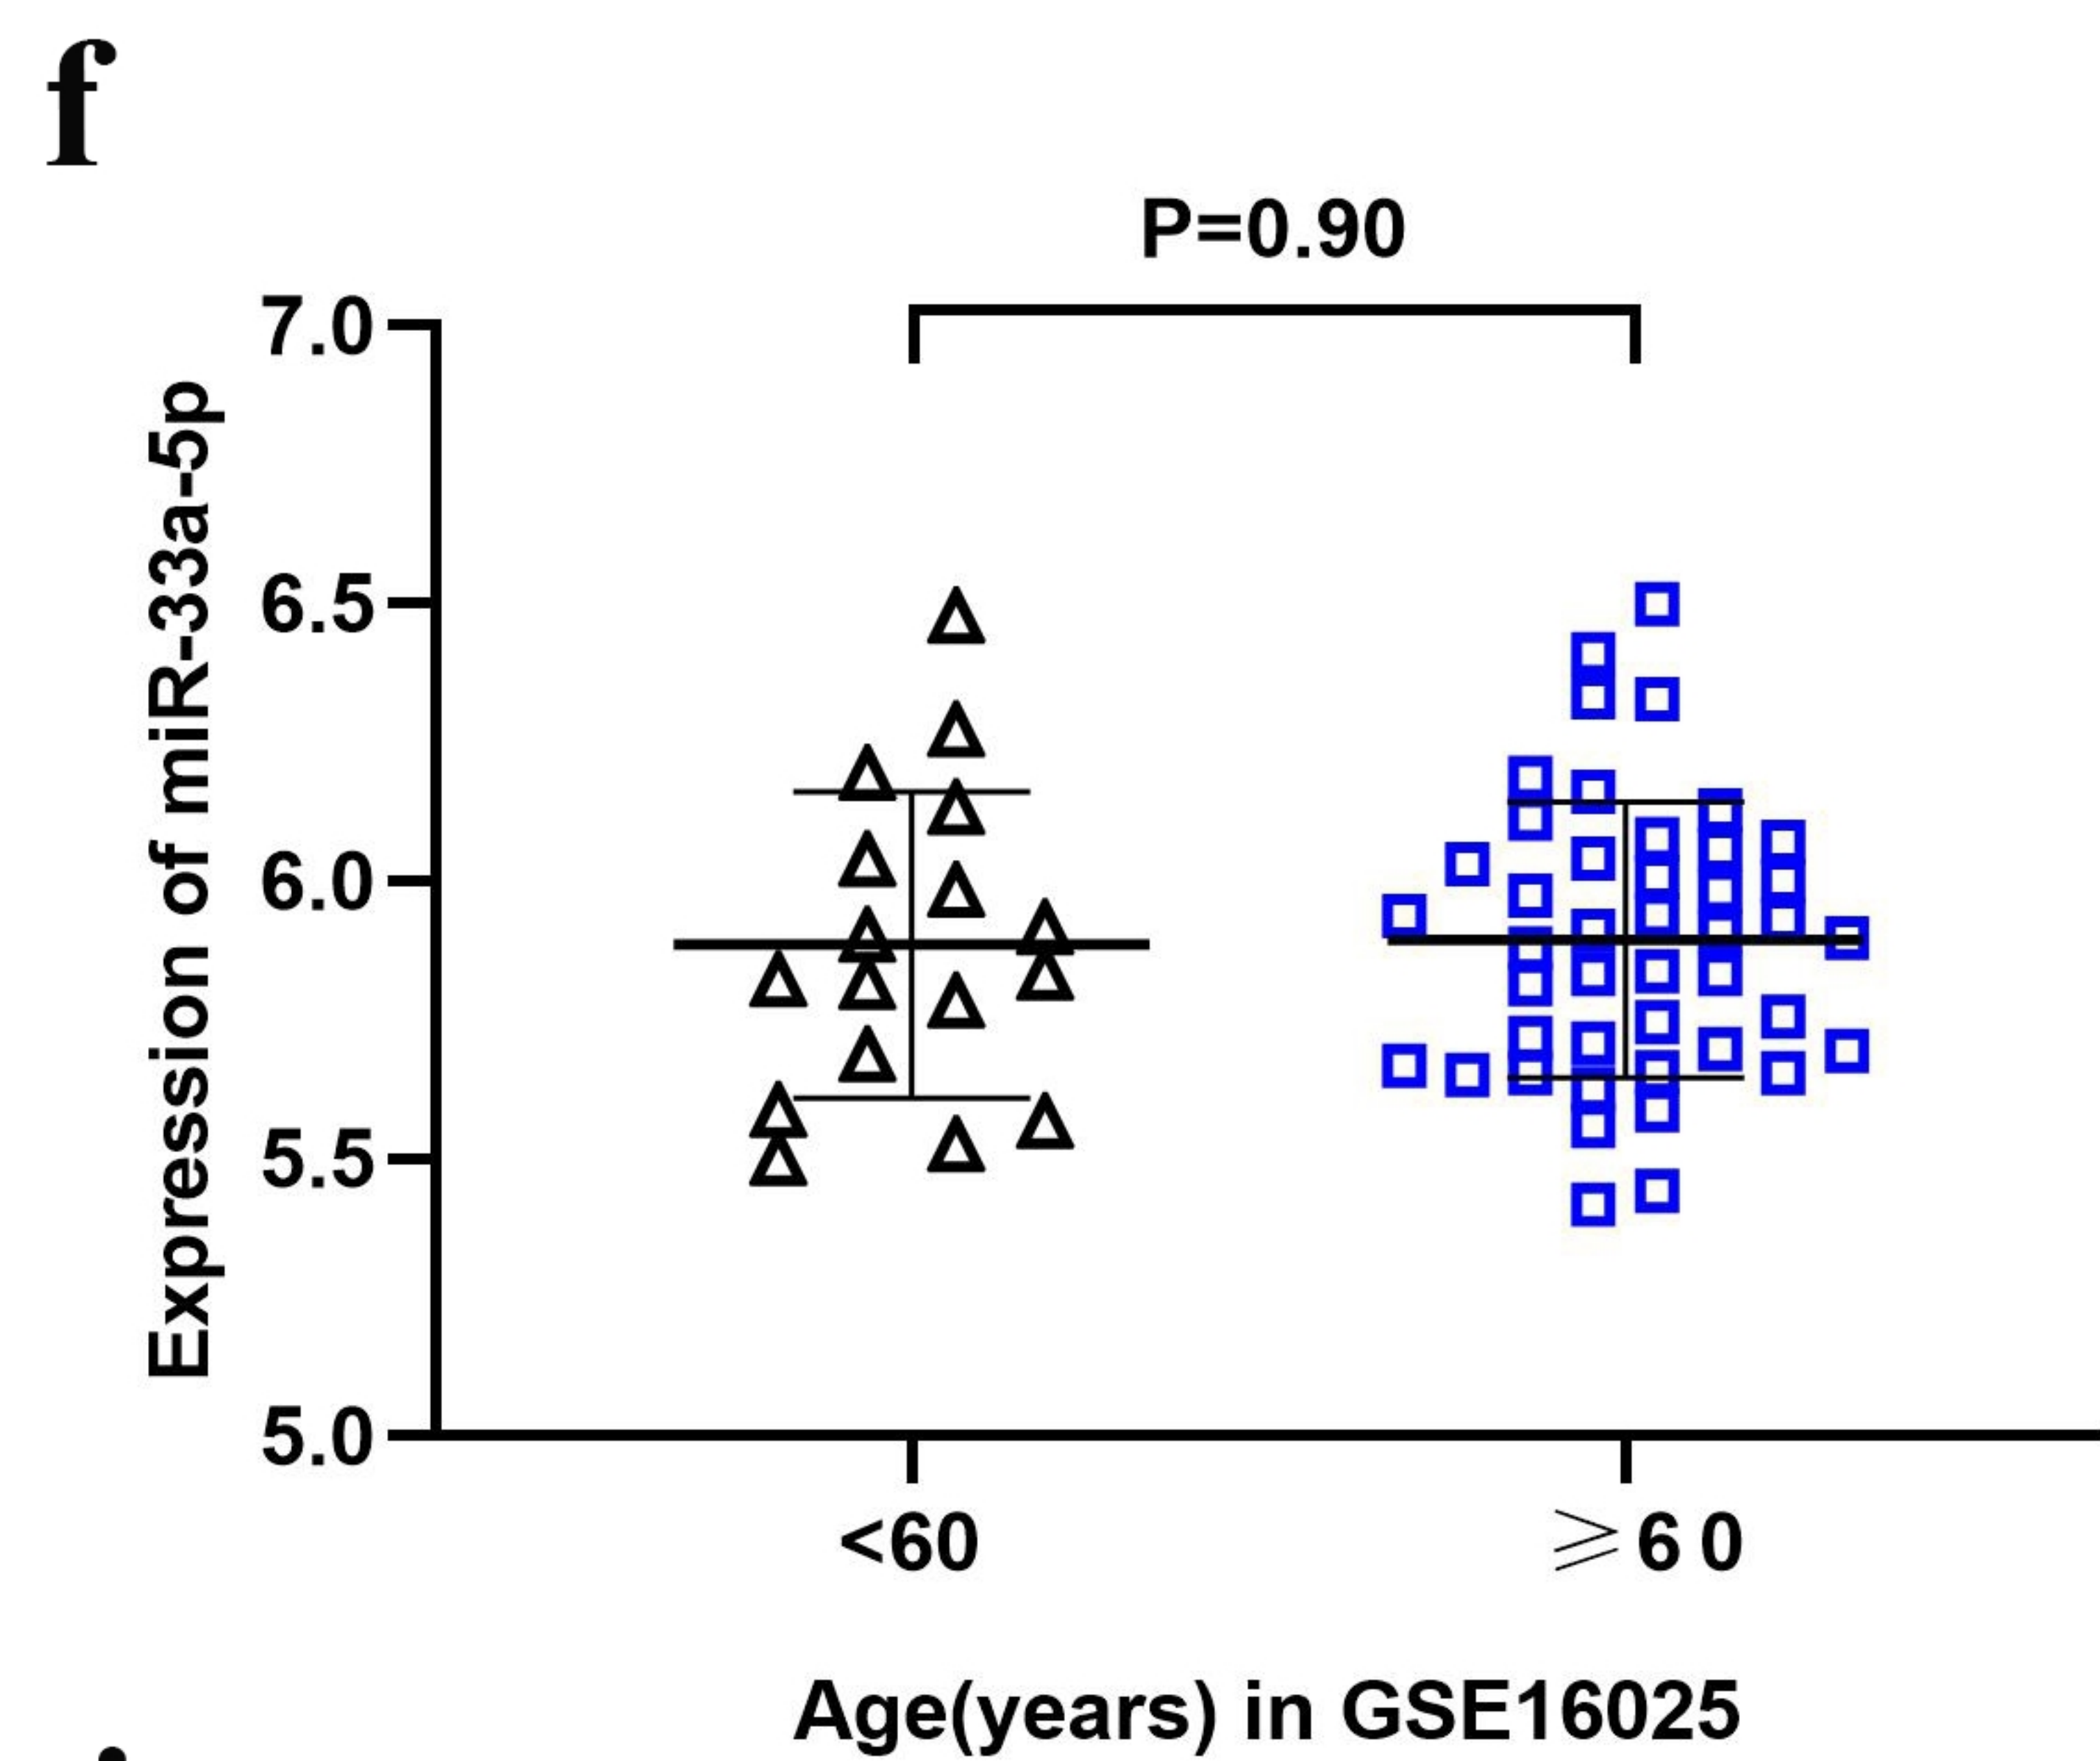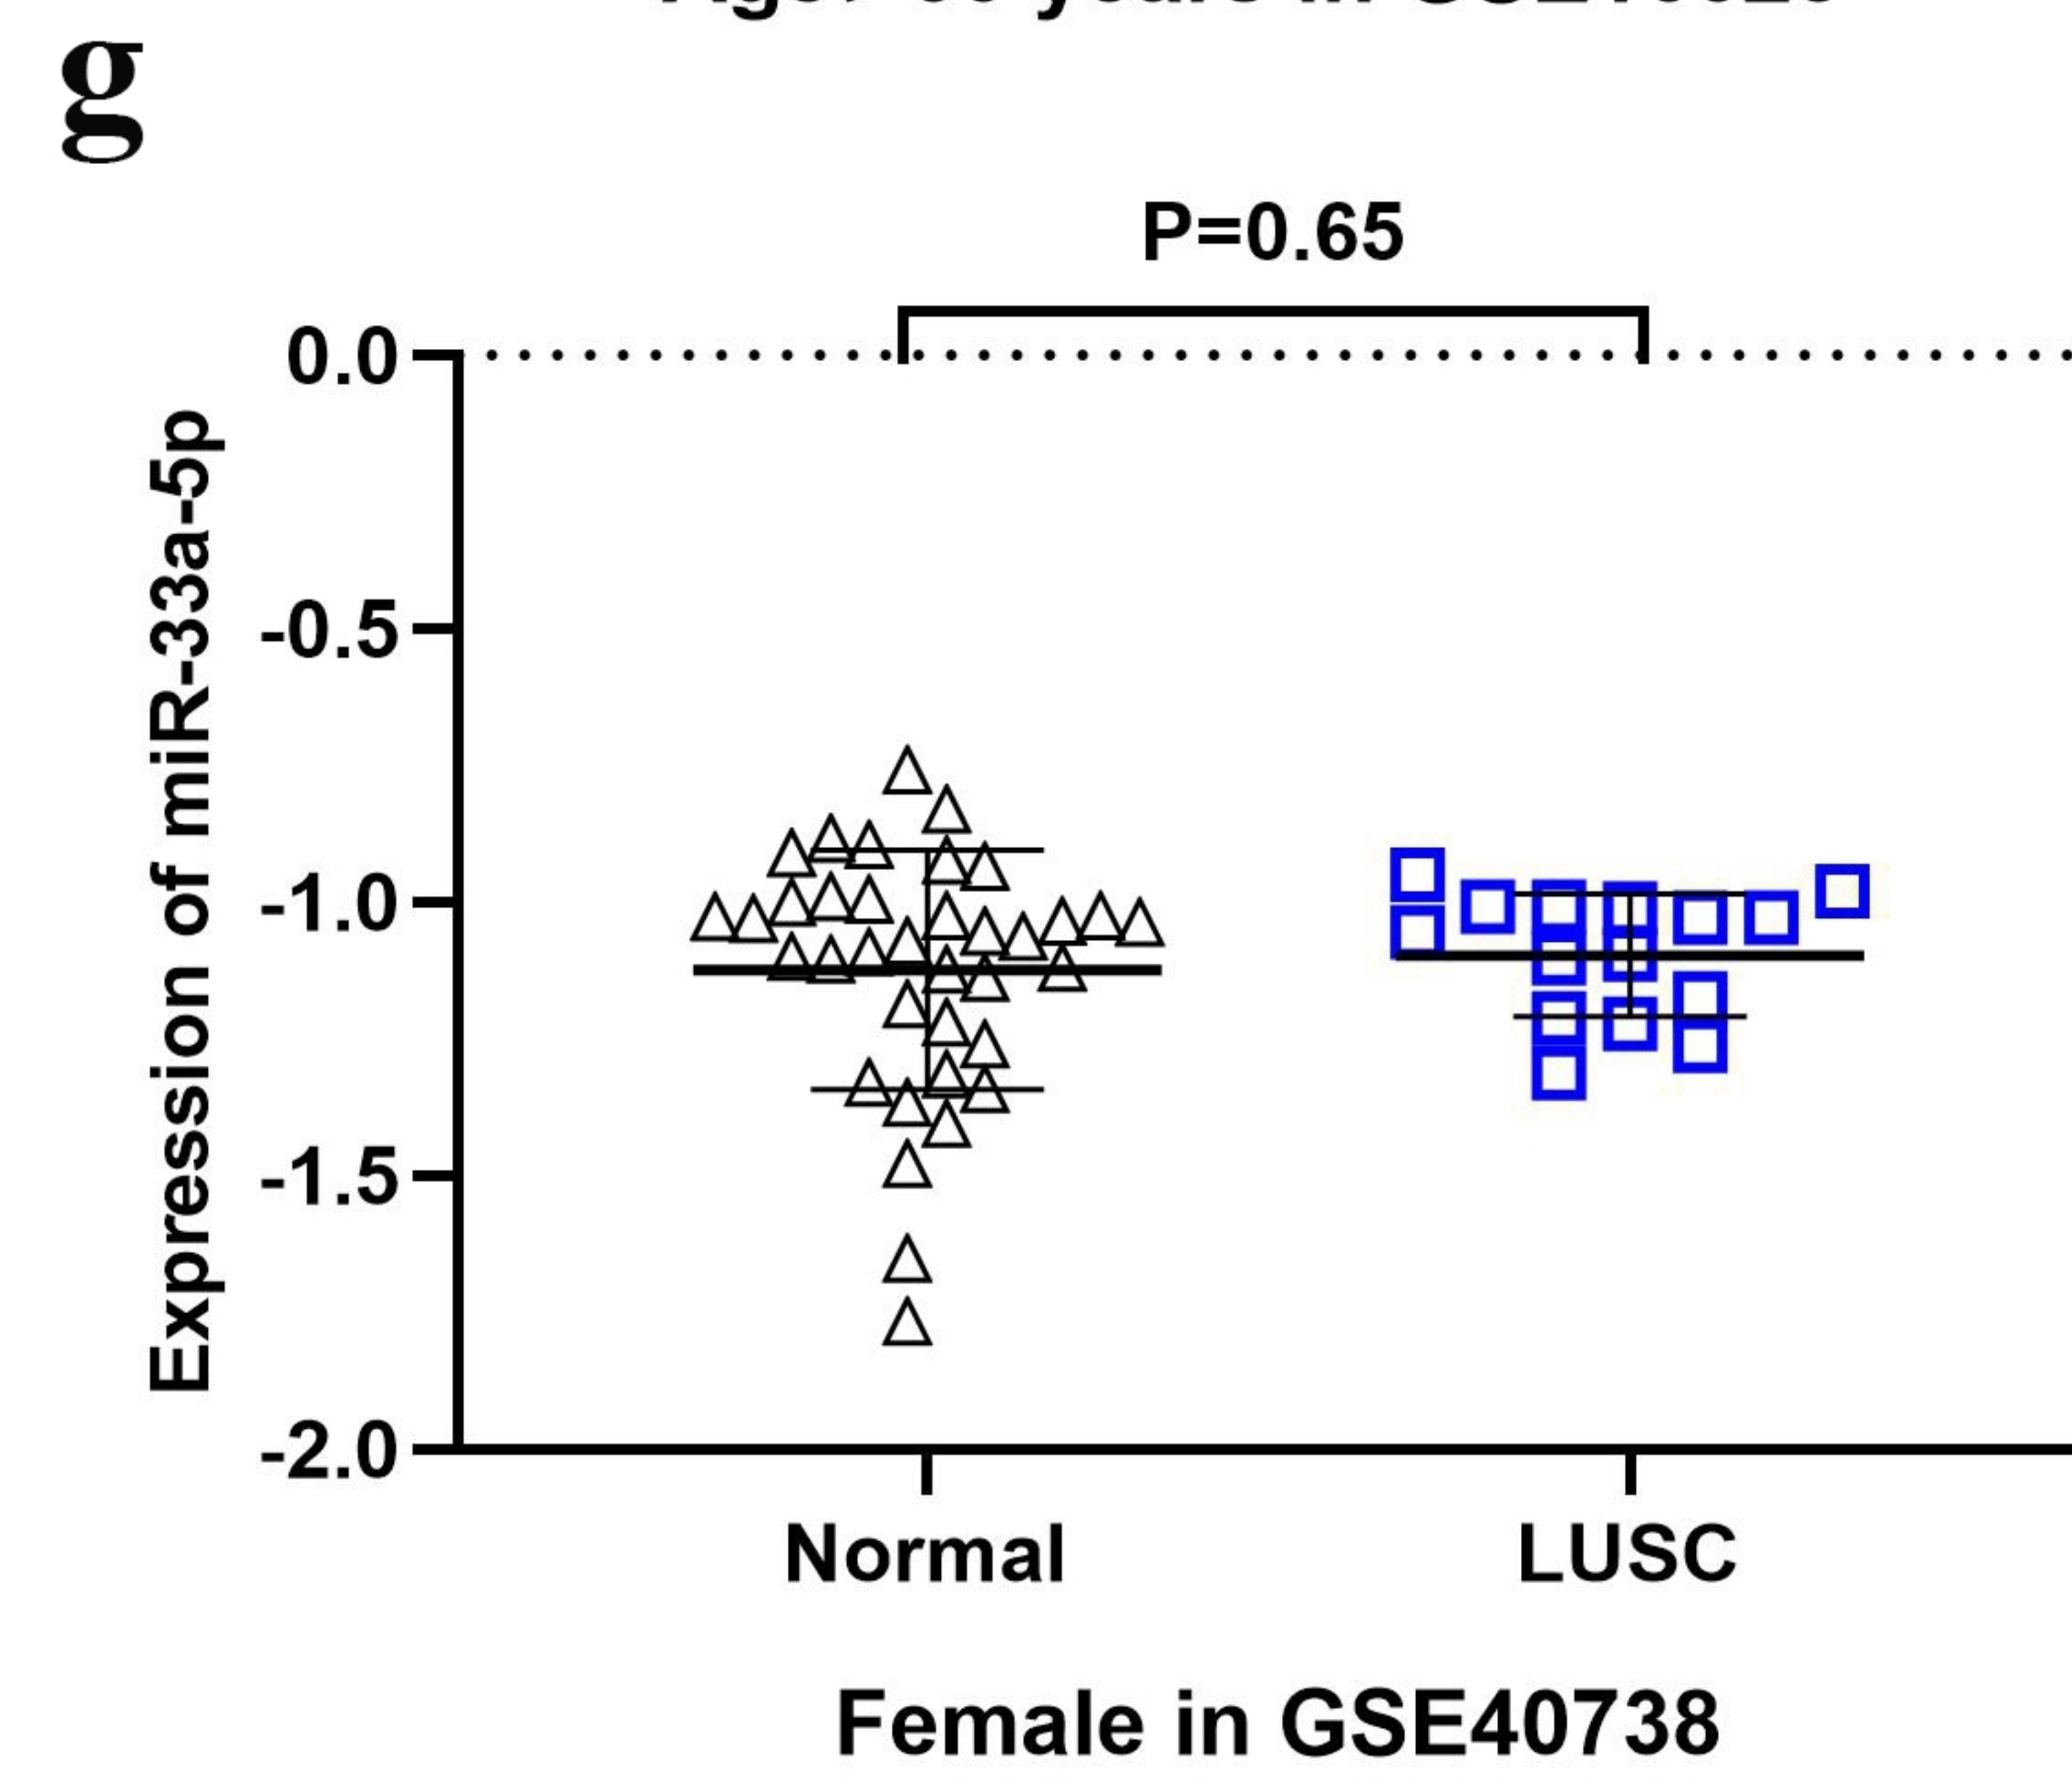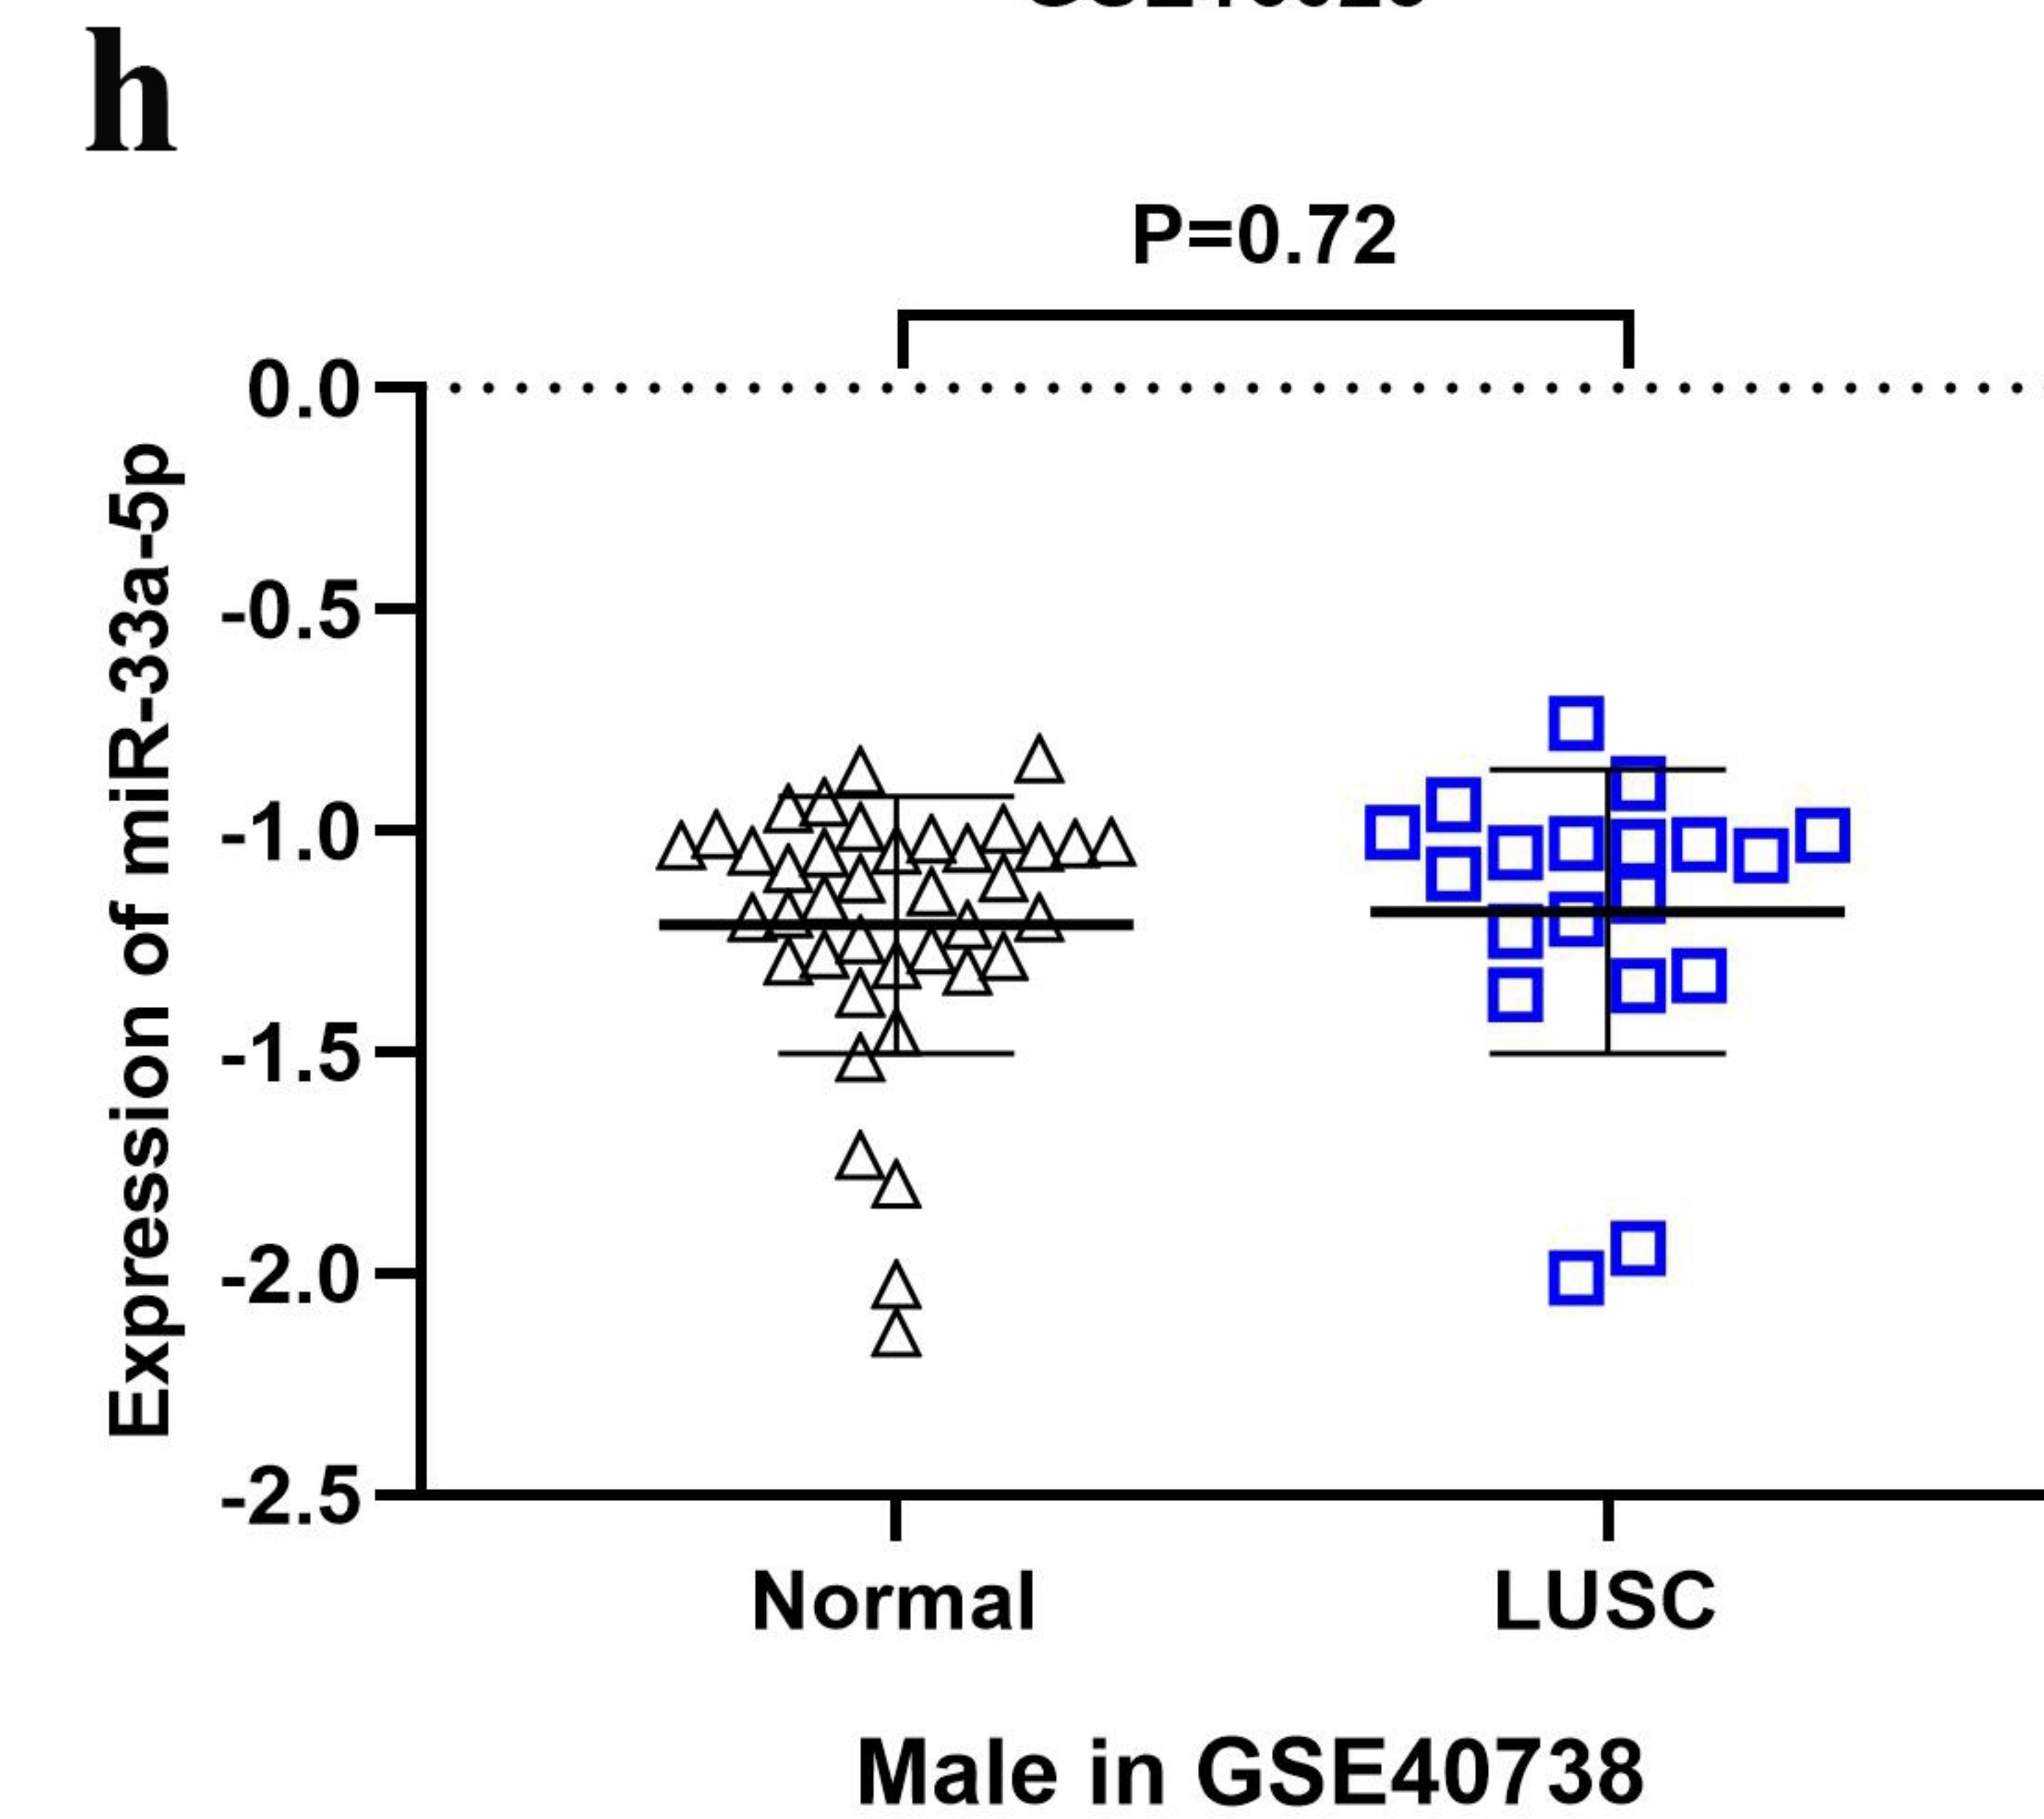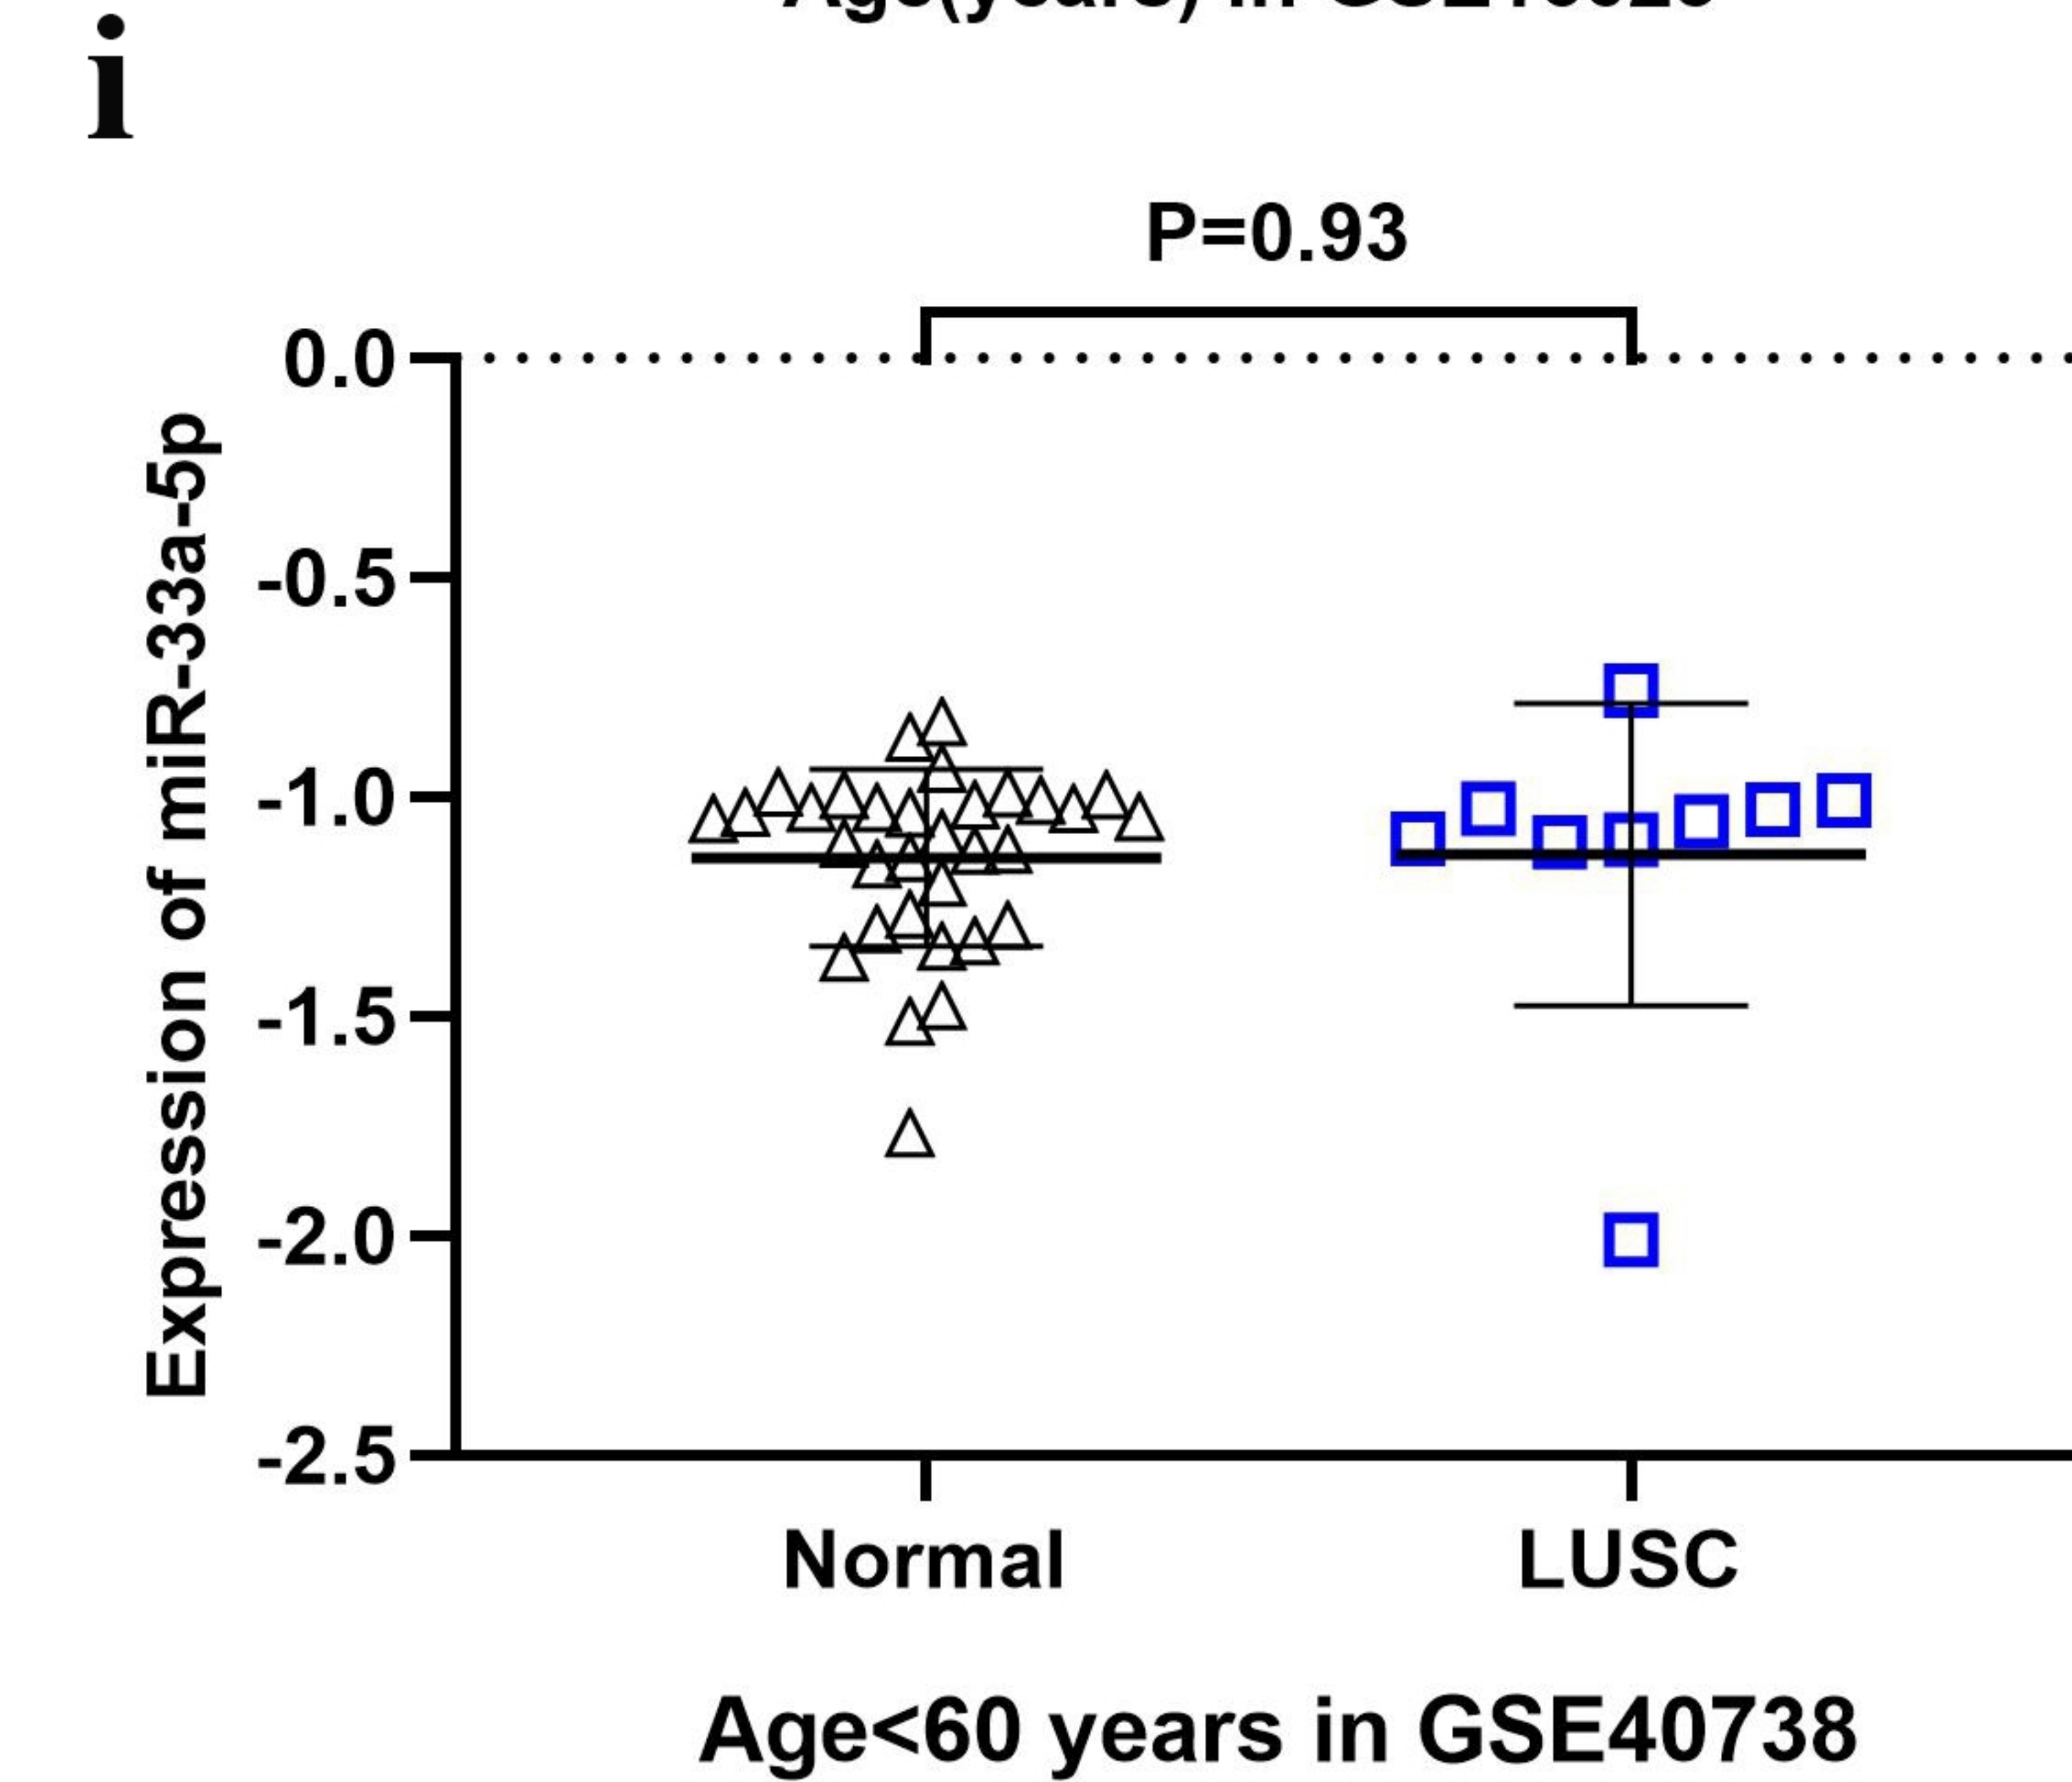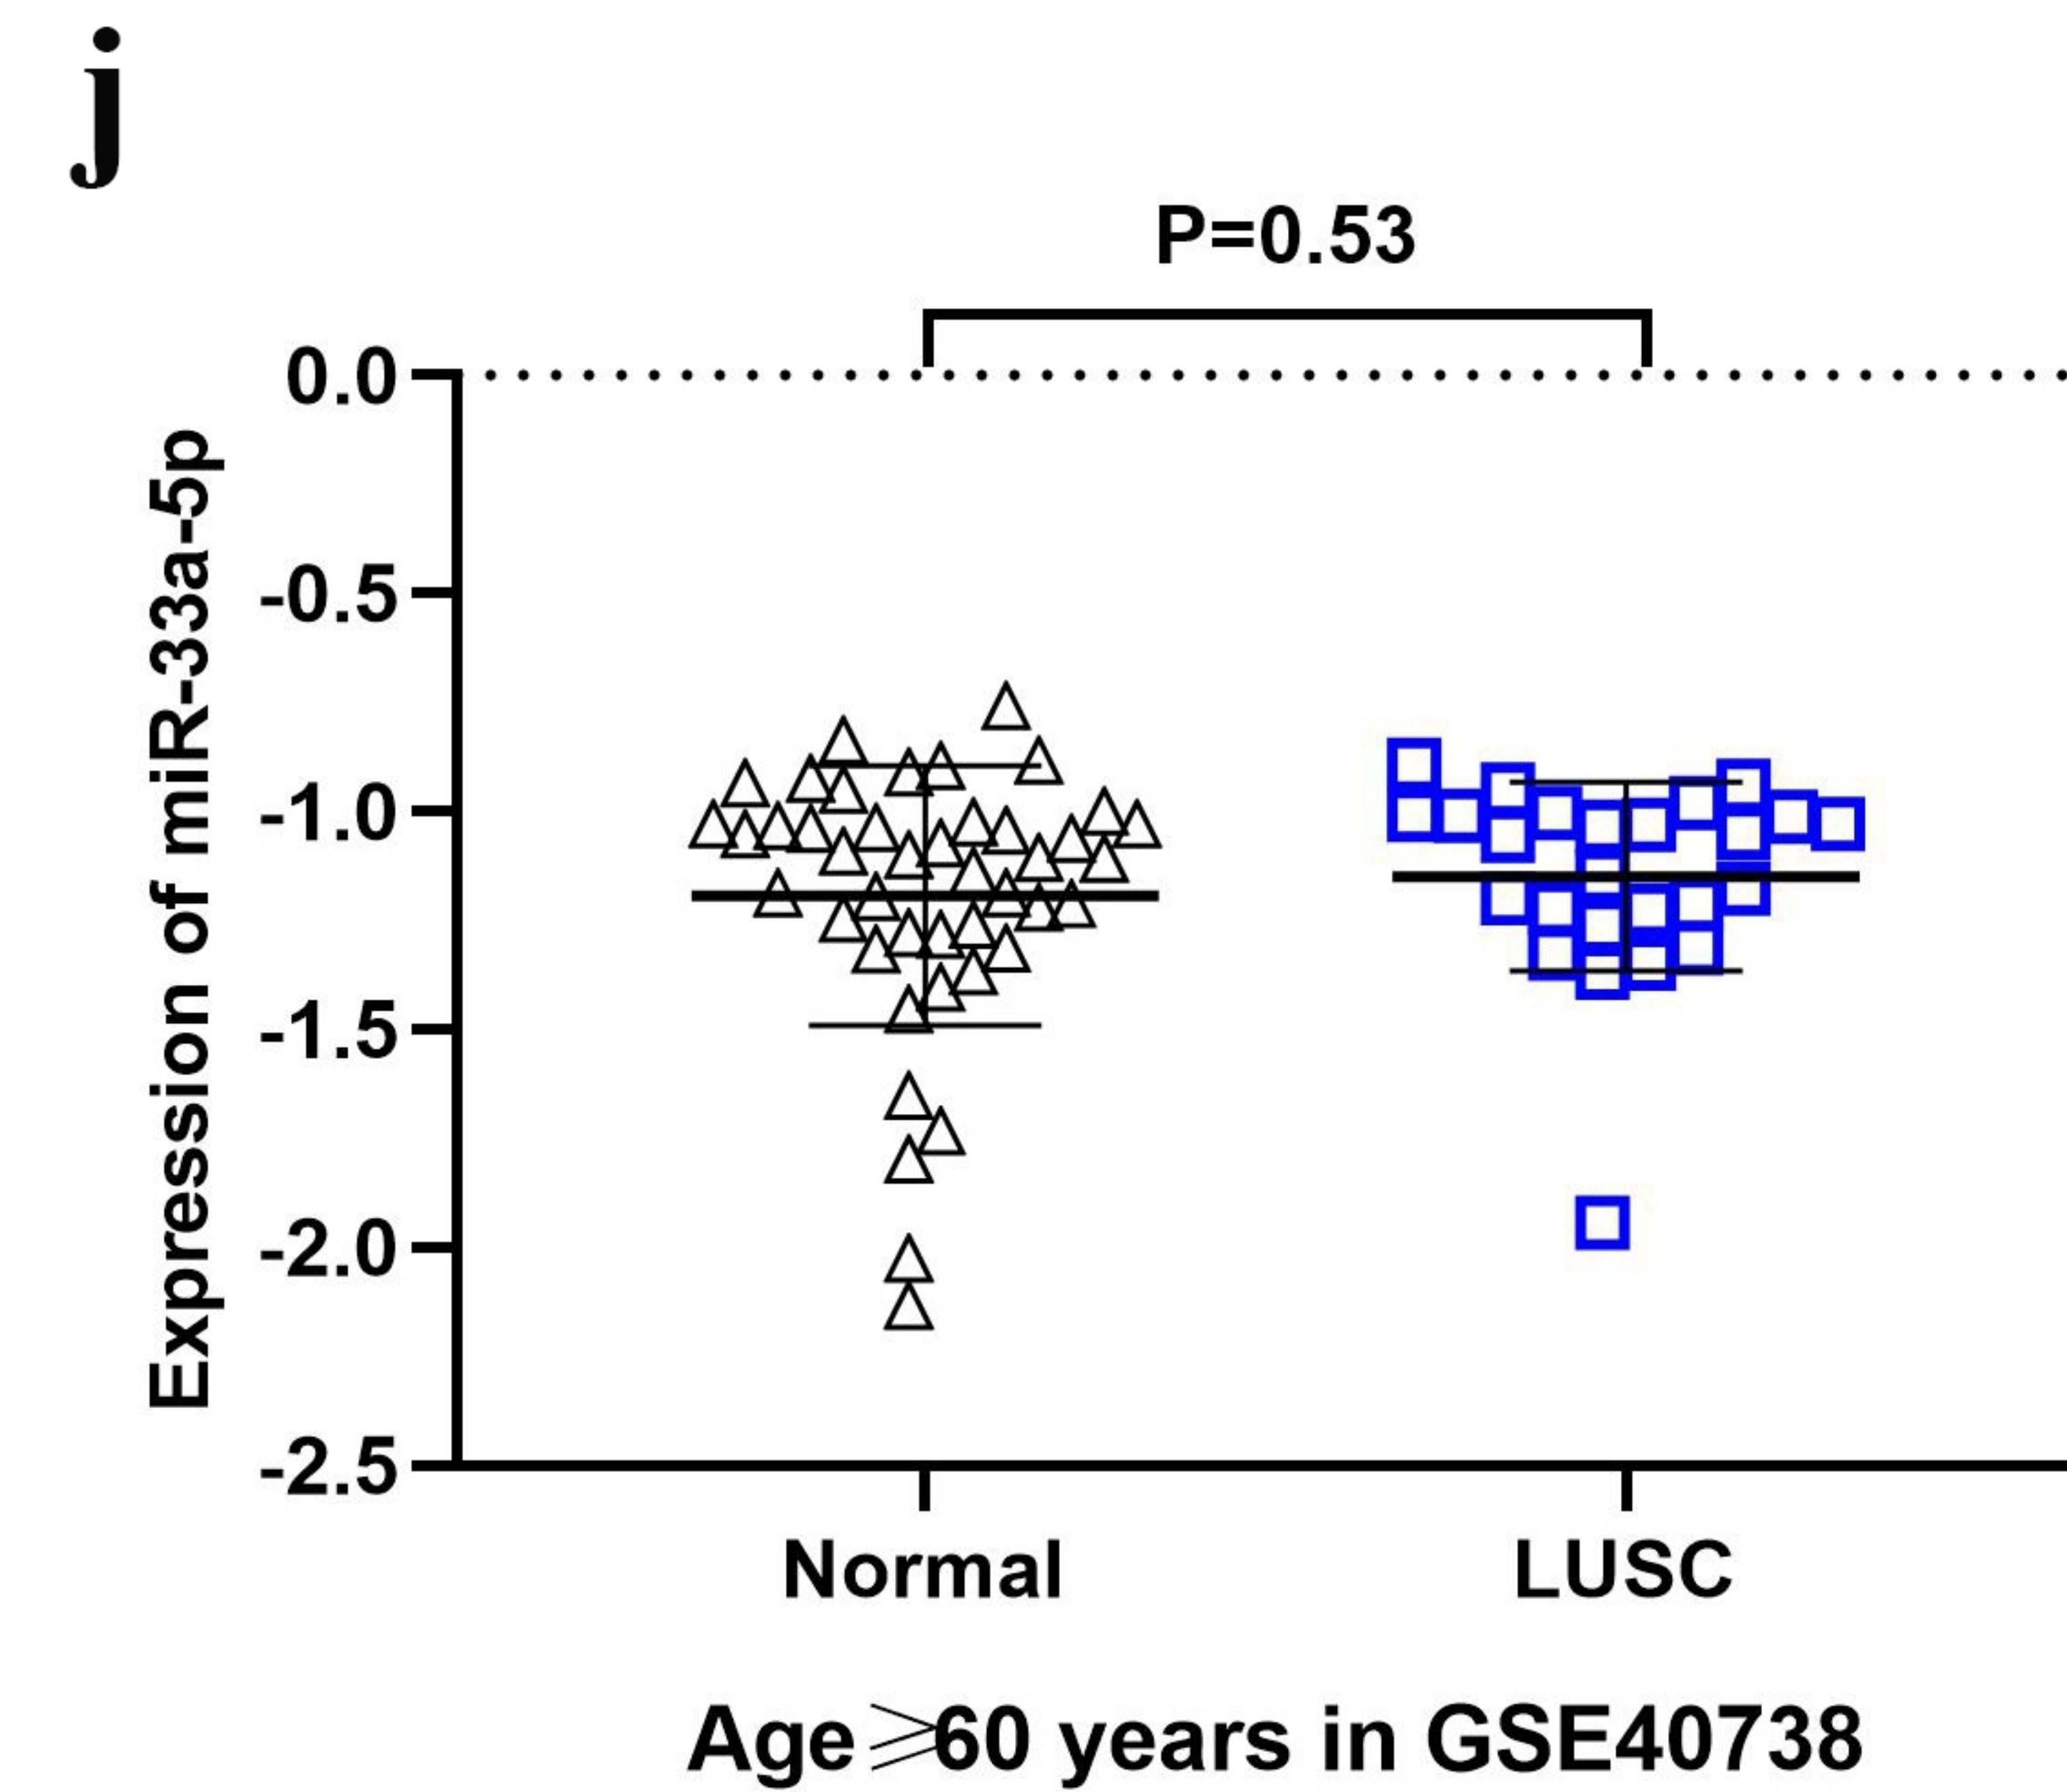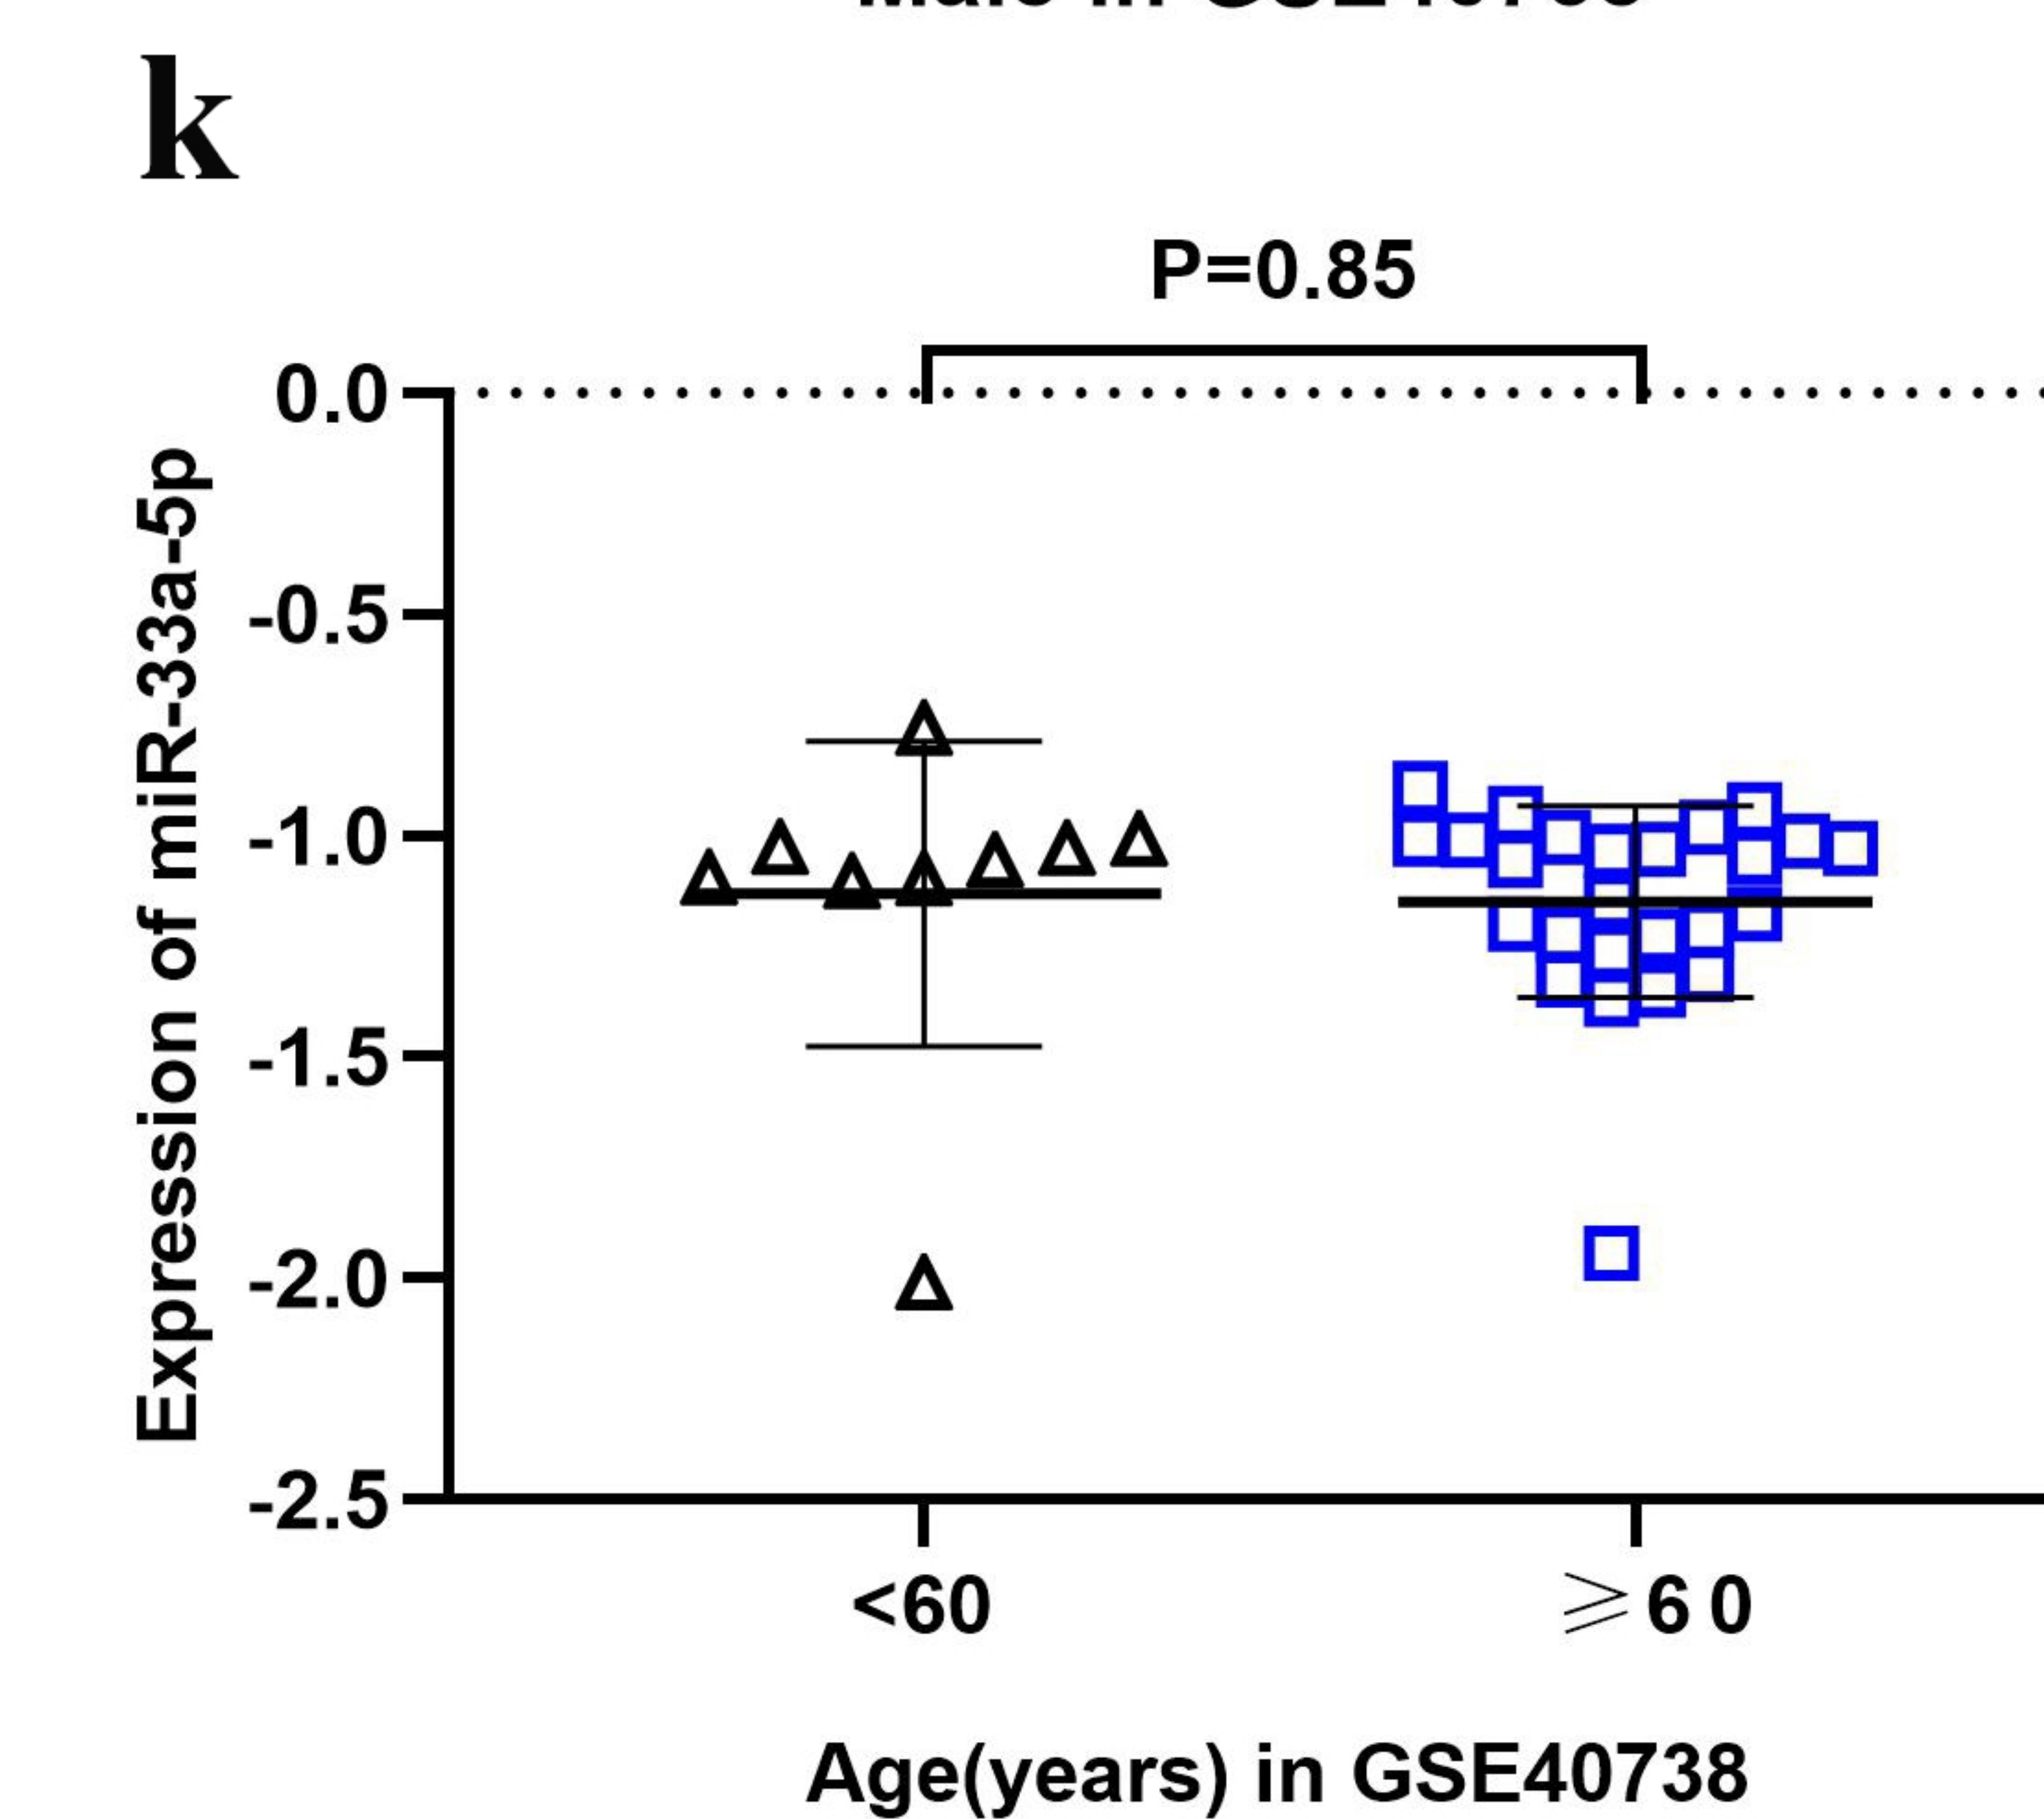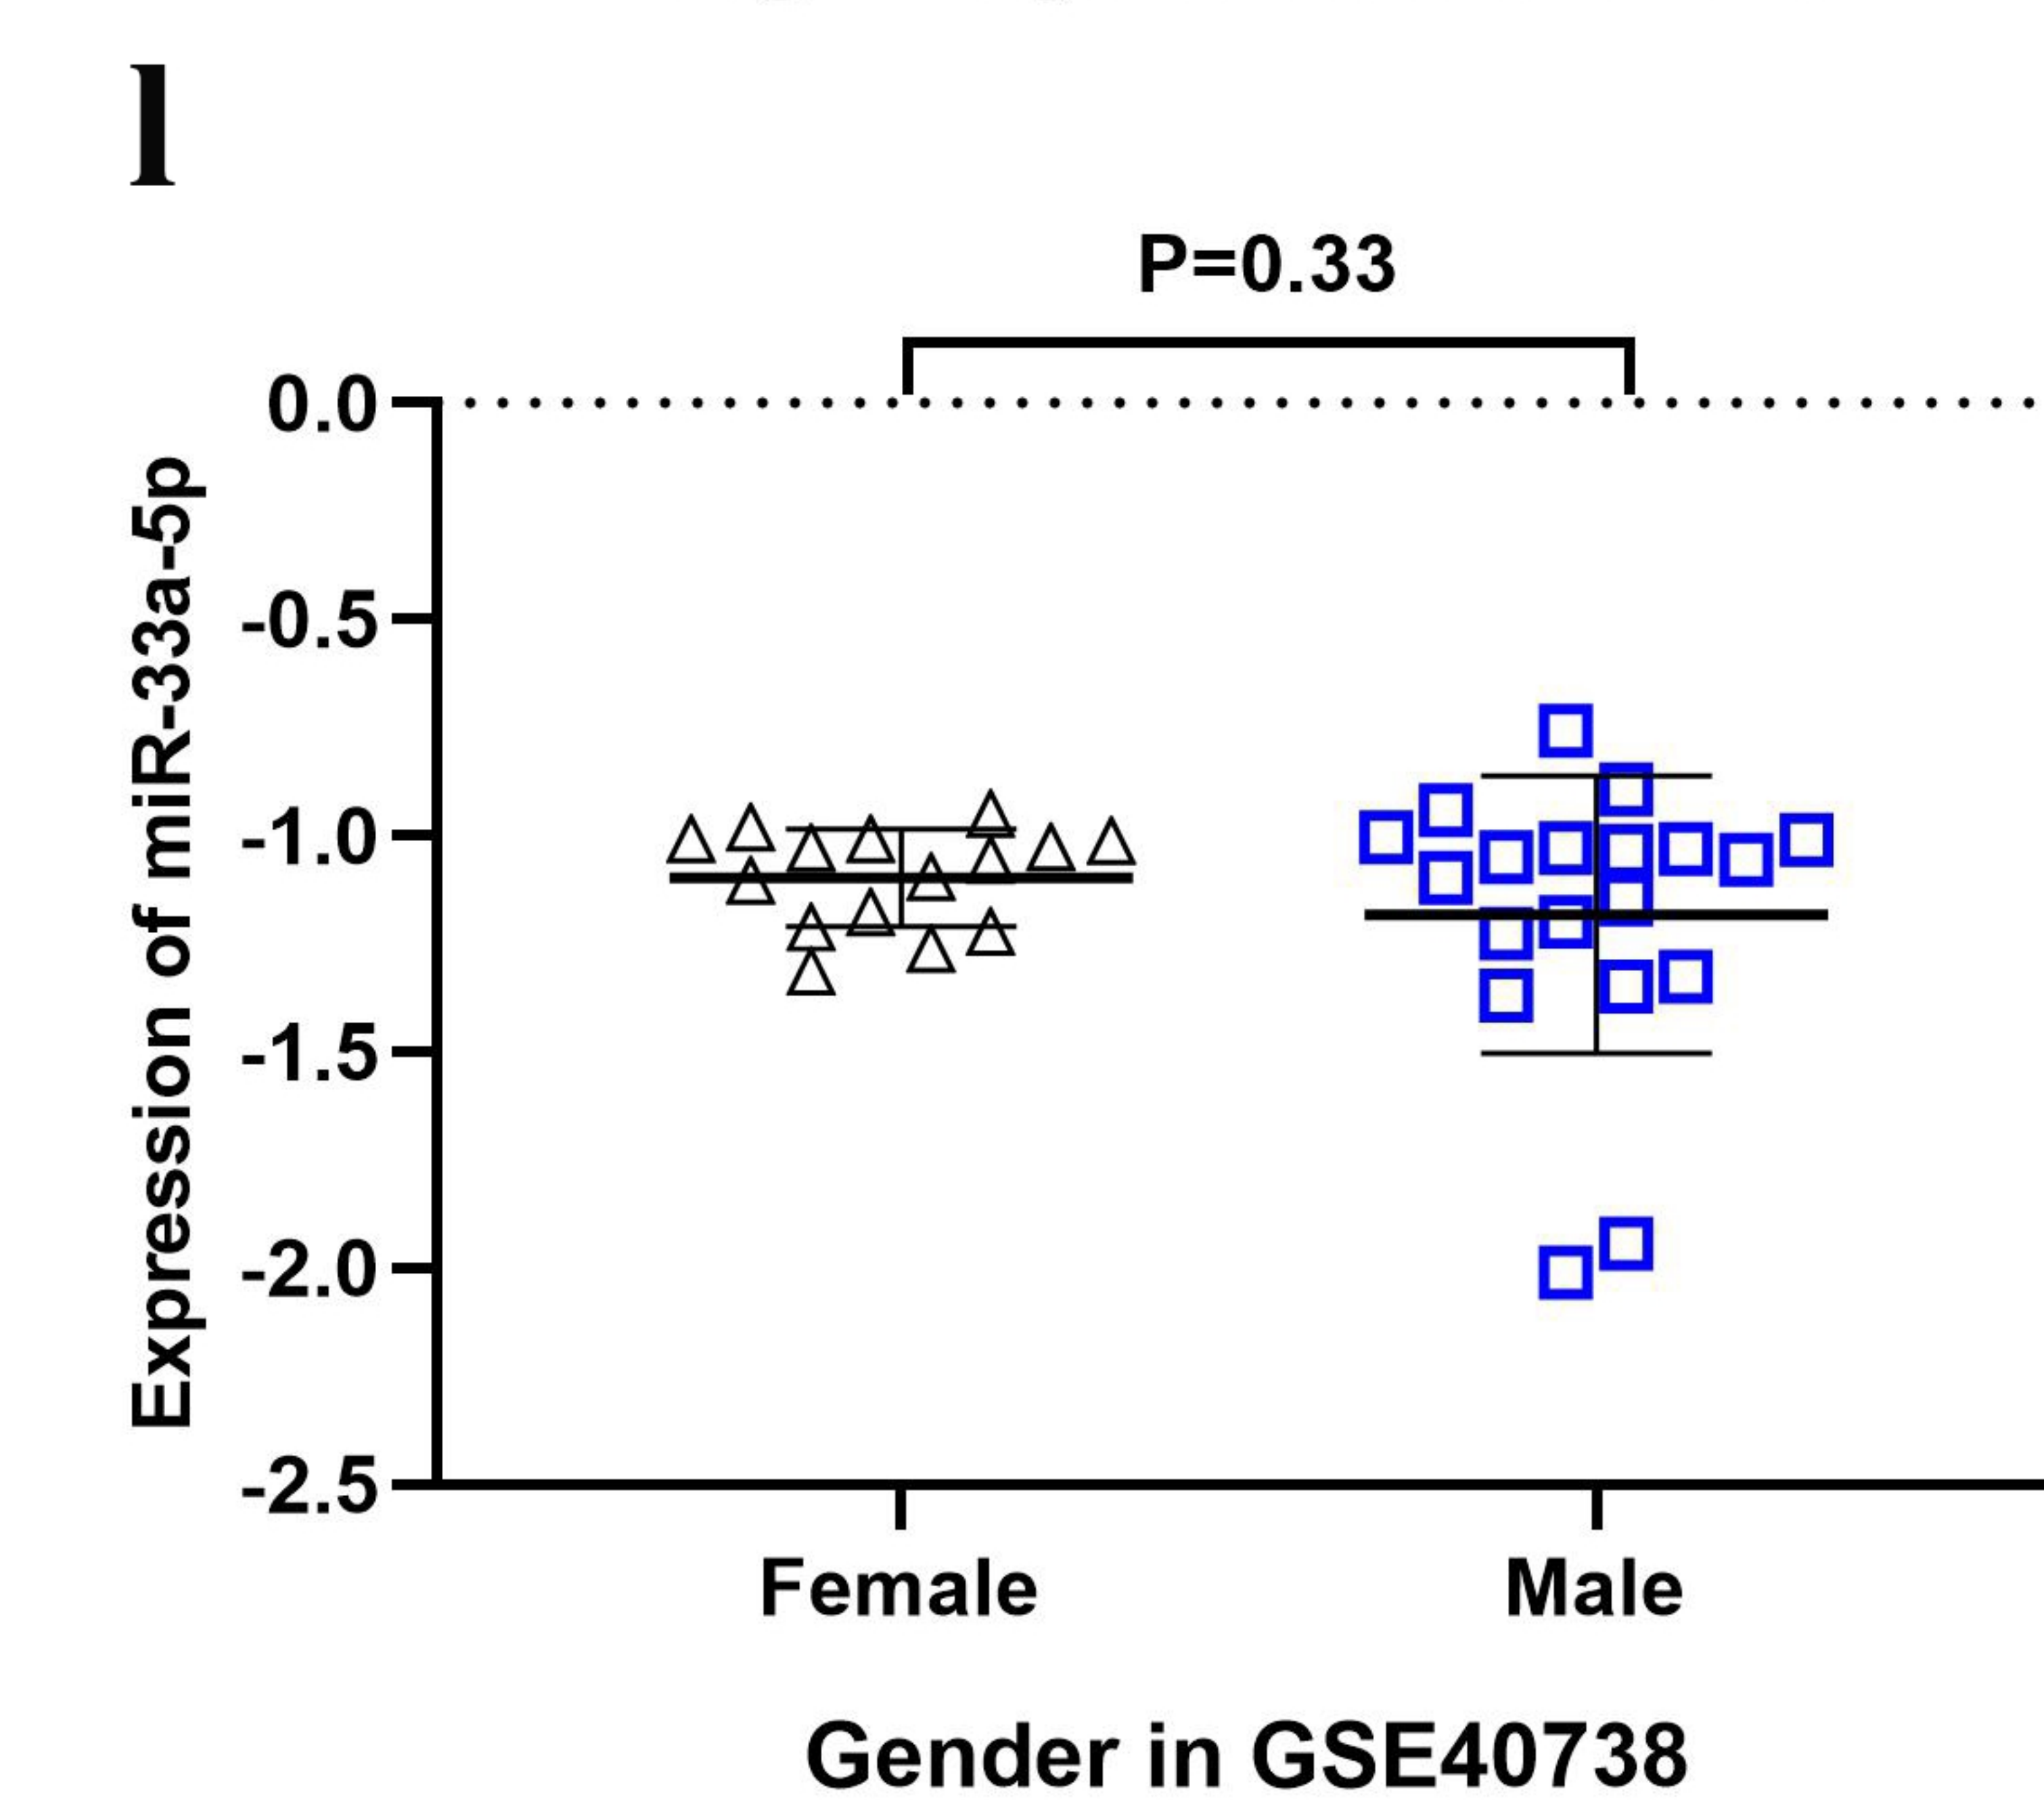

Supplement: f1 [file 6614331.f1.pdf]
